# Supplementary material for: Impact of color-coded and warning nutrition labelling schemes: A systematic review and network meta-analysis
Source: PubMed Central journal article supplement (PMC8491916; doi:10.1371/journal.pmed.1003765), 2021-10-05
Supplement: pmed.1003765.s010.pdf [file pmed.1003765.s010.pdf]

S2 Table. Characteristics of studies included in the systematic review

| article ID | Reference No. | study              | country     | language | total sample size | NFT present along with treatment | time pressure | comparator | study design category                                       | country income | age (mean or range) | age group             | proportion of female | sex           | race  | education (bachelor degree) | income_individual/household | occupation (%major) | product                                                                                                        | product type | real-world setting | field of real-world setting              | label location | warning label | Chilean Warning Label system | other warning label design | nutrition disclosure | health effect | textual WL | textual+non-textual WL | positively framing | negatively framing | color-coded | TLS | summary TLS                                                                         | detailed TLS                                                                                                                                                                     | Nutri-score/5-CNL                                                                                                    |   |   |
|------------|---------------|--------------------|-------------|----------|-------------------|----------------------------------|---------------|------------|-------------------------------------------------------------|----------------|---------------------|-----------------------|----------------------|---------------|-------|-----------------------------|-----------------------------|---------------------|----------------------------------------------------------------------------------------------------------------|--------------|--------------------|------------------------------------------|----------------|---------------|------------------------------|----------------------------|----------------------|---------------|------------|------------------------|--------------------|--------------------|-------------|-----|-------------------------------------------------------------------------------------|----------------------------------------------------------------------------------------------------------------------------------------------------------------------------------|----------------------------------------------------------------------------------------------------------------------|---|---|
| 1          | 1             | Burton 1993        | US          | English  | 343               | N                                | N             | no label   | nonequivalent control group design: posttest design         | high           | ns                  | ns                    | ns                   | mostly female | ns    | ns                          | ns                          | ns                  | Cereal and cereal products, Dairy                                                                              | multiple     | N                  |                                          | package        | Y             | N                            | Y                          | N                    | Y             | Y          | N                      | N                  | Y                  | N           | N   | N                                                                                   | N                                                                                                                                                                                | N                                                                                                                    |   |   |
| 2          | 2             | Bushman 1998       | US          | English  | 240               | N                                | N             | no label   | randomized controlled trial Interrupted Time-Series Design  | high           | ns                  | ns                    | 0.5                  | mixed         | ns    | ns                          | ns                          | ns                  | Dairy                                                                                                          | single       | N                  |                                          | package        | Y             | N                            | Y                          | N                    | Y             | Y          | N                      | N                  | Y                  | N           | N   | N                                                                                   | N                                                                                                                                                                                | N                                                                                                                    | N |   |
| 7          | 3             | Jones 2007         | UK          | English  | 92                | Y                                | N             | no label   | Time-Series Design                                          | high           | 31.5                | adults or most adults | 0.728                | mostly female | ns    | ns                          | ns                          | ns                  | NS                                                                                                             | NS           | N                  |                                          | package        | N             | N                            | N                          | N                    | N             | N          | N                      | N                  | N                  | Y           | Y   | N                                                                                   | Y (simple MTL) Y (detailed MTL + interpretative texts, detailed Y)                                                                                                               | N                                                                                                                    | N |   |
| 10         | 4             | Borgmeier 2009     | Germany     | English  | 252               | N                                | N             | no label   | randomized controlled trial                                 | high           | 36                  | adults or most adults | 0.536                | mixed         | ns    | high                        | ns                          | ns                  | general food and beverage products                                                                             | multiple     | N                  |                                          | package        | N             | N                            | N                          | N                    | N             | N          | N                      | N                  | N                  | Y           | Y   | N                                                                                   | Y (detailed MTL + interpretative texts, detailed Y)                                                                                                                              | N                                                                                                                    | N |   |
| 12         | 5             | Drichoutis 2009    | Greece      | English  | 29                | N                                | N             | no label   | choice conjoint task                                        | high           | ns                  | ns                    | ns                   | mostly female | ns    | ns                          | ns                          | ns                  | Convenient foods                                                                                               | single       | N                  |                                          | package        | N             | N                            | N                          | N                    | N             | N          | N                      | N                  | N                  | Y           | Y   | N                                                                                   | Y (detailed MTL) Y (simple MTL, detailed MTL) Y                                                                                                                                  | N                                                                                                                    | N |   |
| 13         | 6             | Gorton 2009        | New Zealand | English  | 1525              | N                                | N             | NFT        | cross-sectional                                             | high           | 41                  | adults or most adults | 0.7                  | mostly female | ns    | low                         | mix                         | ns                  | snack foods                                                                                                    | single       | N                  |                                          | package        | N             | N                            | N                          | N                    | N             | N          | N                      | N                  | N                  | Y           | Y   | Y                                                                                   | Y (simple MTL, detailed MTL) Y                                                                                                                                                   | N                                                                                                                    | N |   |
| 15         | 7             | Sacks 2009         | UK          | English  | sales data        | Y                                | N             | no label   | one-group design: pretest-posttest design                   | high           |                     |                       |                      |               |       |                             |                             |                     | Convenient foods                                                                                               | single       | Y                  | supermarkets and grocery stores          | package        | N             | N                            | N                          | N                    | N             | N          | N                      | N                  | N                  | Y           | Y   | N                                                                                   | Y (detailed MTL) Y (detailed MTL+interpretive text, detailed MTL) Y (simple MTL + interpretative texts: fat, saturated fat, sugar)                                               | N                                                                                                                    | N |   |
| 17         | 8             | Fatimah 2010       | Malaysia    | English  | 232               | Y                                | N             | no label   | nonequivalent control group design: pretest-posttest design | upper-middle   | 20-59               | adults or most adults | 1                    | mostly female | mix   | low                         | ns                          | ns                  | NS                                                                                                             | NS           | N                  |                                          | package        | N             | N                            | N                          | N                    | N             | N          | N                      | N                  | N                  | Y           | Y   | N                                                                                   | Y (base on calories, added sugar and fat) Y (base on calories, added sugar and fat)                                                                                              | N                                                                                                                    | N |   |
| 23         | 9             | Sacks 2011         | Australia   | English  | sales data        | Y                                | N             | no label   | nonequivalent control group design: pretest-posttest design | high           |                     |                       |                      |               |       |                             |                             |                     | Bread & dairy                                                                                                  | multiple     | Y                  | supermarkets and grocery stores (online) | package        | N             | N                            | N                          | N                    | N             | N          | N                      | N                  | N                  | Y           | Y   | N                                                                                   | Y (base on calories, added sugar and fat) Y (base on calories, added sugar and fat)                                                                                              | N                                                                                                                    | N |   |
| 24         | 10            | van Herpen 2011a   | US          | English  | 51                | N                                | N             | no label   | Interrupted Time-Series Design                              | high           | 25.8                | adults or most adults | 0.55                 | mixed         | mix   | low                         | low                         | ns                  | restaurant meals                                                                                               | multiple     | N                  |                                          | package        | N             | N                            | N                          | N                    | N             | N          | N                      | N                  | N                  | Y           | Y   | Y (base on calories, added sugar and fat) Y (base on calories, added sugar and fat) | N                                                                                                                                                                                | N                                                                                                                    |   |   |
| 24         | 10            | van Herpen 2011b   | US          | English  | 41                | N                                | N             | no label   | randomized controlled trial                                 | high           | 27.8                | adults or most adults | ns                   | mixed         | mix   | low                         | low                         | ns                  | restaurant meals                                                                                               | multiple     | N                  |                                          | package        | N             | N                            | N                          | N                    | N             | N          | N                      | N                  | N                  | Y           | Y   | Y (base on calories, added sugar and fat) Y (base on calories, added sugar and fat) | N                                                                                                                                                                                | N                                                                                                                    |   |   |
| 25         | 11            | van Herpen 2011c   | Netherlands | English  | 156               | N                                | N             | no label   | randomized controlled trial                                 | upper-middle   | 20.8                | adults or most adults | 0.65                 | mostly female | ns    | ns                          | ns                          | ns                  | Cereal and cereal products                                                                                     | single       | N                  |                                          | package        | N             | N                            | N                          | N                    | N             | N          | N                      | N                  | N                  | Y           | Y   | N                                                                                   | Y (detailed MTL) Y                                                                                                                                                               | N                                                                                                                    | N |   |
| 25         | 11            | van Herpen 2011d   | Turky       | English  | 131               | N                                | Y             | no label   | randomized controlled trial                                 | high           | >19                 | adults or most adults | 0.533                | mixed         | ns    | ns                          | ns                          | ns                  | Cereal and cereal products                                                                                     | multiple     | N                  |                                          | package        | N             | N                            | N                          | N                    | N             | N          | N                      | N                  | N                  | Y           | Y   | N                                                                                   | Y (detailed MTL) Y                                                                                                                                                               | N                                                                                                                    | N |   |
| 27         | 12            | Ares 2012          | Uruguay     | English  | 178               | N                                | N             | no label   | choice conjoint task                                        | high           | >18                 | adults or most adults | 0.58                 | mixed         | ns    | ns                          | ns                          | ns                  | bakery products, Dairy                                                                                         | multiple     | N                  |                                          | package        | N             | N                            | N                          | N                    | N             | N          | N                      | N                  | N                  | Y           | Y   | N                                                                                   | Y (detailed MTL) Y                                                                                                                                                               | N                                                                                                                    | N |   |
| 32         | 13            | Koenigstorfer 2012 | Germany     | English  | 184               | N                                | N             | no label   | nonequivalent control group design: posttest design         | high           | ns                  | ns                    | ns                   | ns            | ns    | ns                          | ns                          | ns                  | Cereal and cereal products                                                                                     | single       | Y                  | supermarkets and grocery stores          | package        | N             | N                            | N                          | N                    | N             | N          | N                      | N                  | N                  | Y           | Y   | Y                                                                                   | Y (base on calories, added sugar and fat) Y (base on calories, added sugar and fat)                                                                                              | N                                                                                                                    | N |   |
| 33         | 14            | McLean 2012        | New Zealand | English  | 691               | Y                                | N             | no label   | choice conjoint task                                        | high           | 50                  | adults or most adults | 0.57                 | mixed         | white | low                         | ns                          | ns                  | Fruit and vegetables                                                                                           | single       | N                  |                                          | package        | N             | N                            | N                          | N                    | N             | N          | N                      | N                  | N                  | Y           | Y   | N                                                                                   | Y (simple MTL + interpretative text: fat, saturated fat, sugar) Y (simple MTL + interpretative texts: saturated fat, sugar, sodium, simple MTL + interpretative texts: saturated | N                                                                                                                    | N |   |
| 36         | 15            | Roberto 2012       | US          | English  | 409               | N                                | N             | no label   | randomized controlled trial                                 | high           | 46.01               | adults or most adults | 0.526                | mixed         | white | low                         | mix                         | ns                  | Non-alcoholic beverages, Bread & bakery products, Cereal and cereal products, Sauces and spreads, snack foods. | multiple     | N                  |                                          | package        | N             | N                            | N                          | N                    | N             | N          | N                      | N                  | N                  | N           | Y   | Y                                                                                   | N                                                                                                                                                                                | Y (simple MTL + interpretative text: fat, saturated fat, sugar, sodium, simple MTL + interpretative texts: saturated | N | N |

|    |    |                    |             |         |       |   |   |             |                                                             |      |          |                       |       |               |       |      |     |                                                              |                                                                                                                                                                               |          |   |           |         |   |   |   |   |   |   |   |   |   |   |   |   |                                        |                                                                                                                                           |
|----|----|--------------------|-------------|---------|-------|---|---|-------------|-------------------------------------------------------------|------|----------|-----------------------|-------|---------------|-------|------|-----|--------------------------------------------------------------|-------------------------------------------------------------------------------------------------------------------------------------------------------------------------------|----------|---|-----------|---------|---|---|---|---|---|---|---|---|---|---|---|---|----------------------------------------|-------------------------------------------------------------------------------------------------------------------------------------------|
| 37 | 16 | Antúnez 2013       | Uruguay     | English | 47    | Y | N | no label    | choice conjoint task                                        | high | >18      | adults or most adults | 0.58  | mixed         | ns    | ns   | ns  | ns                                                           | Bread & bakery products                                                                                                                                                       | single   | N |           | package | N | N | N | N | N | N | N | N | N | N | Y | Y | N                                      | Y (detailed MTL)<br>Y (simple TLL + interpretative texts: sodium only, detailed TLL + interpretative Y (simple MTL: saturated fat, sugar. |
| 41 | 17 | Goodman 2013       | Canada      | English | 247   | Y | N | no label    | randomized controlled trial                                 | high | >18      | adults or most adults | 0.535 | mixed         | white | high | mix | ns                                                           | snack foods                                                                                                                                                                   | single   | N |           | package | N | N | N | N | N | N | N | N | N | N | Y | Y | N                                      | Y (based on "SAIN LIM" system)                                                                                                            |
| 44 | 18 | Mejean 2013        | France      | English | 39370 | N | N | summary TLS | cross-sectional                                             | high | adults   | adults or most adults | 0.765 | mostly female | ns    | high | ns  | mix                                                          | Convenient foods                                                                                                                                                              | single   | N |           | package | N | N | N | N | N | N | N | N | N | Y | Y | N | Y (based on "SAIN LIM" system)         |                                                                                                                                           |
| 48 | 19 | Savoie 2013        | Canada      | English | 2200  | N | N | no label    | nonequivalent control group design: pretest-posttest design | high | >18      | adults or most adults | 0.65  | mostly female | white | high | mix | ns                                                           | eggs, Cereal and cereal products, Bread & bakery products, Dairy, Non-alcoholic beverages, snack foods, Confectionery, Fruit and Vegetables, Meat and meat products, Fish and | multiple | N |           | package | N | N | N | N | N | N | N | N | N | N | Y | Y | N                                      | Y (detailed MTL)                                                                                                                          |
| 49 | 20 | Sonnenberg 2013    | US          | English | 389   | N | N | no label    | nonequivalent control group design: posttest design         | high | most >40 | adults or most adults | 0.59  | mixed         | white | ns   | ns  | ns                                                           | campus/workplace cafeteria meal                                                                                                                                               | multiple | Y | cafeteria | package | N | N | N | N | N | N | N | N | N | N | Y | Y | N                                      | Y (base on 3 positive criteria and 2 negative criteria)                                                                                   |
| 50 | 21 | Ares 2014          | Uruguay     | English | 71    | Y | N | no label    | choice conjoint task                                        | high | 25.3     | adults or most adults | 0.68  | mostly female | ns    | ns   | ns  | ns                                                           | Dairy                                                                                                                                                                         | single   | N |           | package | N | N | N | N | N | N | N | N | N | Y | Y | N | Y (detailed MTL: sugar, fat, saturated |                                                                                                                                           |
| 56 | 22 | Emrich 2014        | Canada      | English | 1188  | Y | N | no label    | randomized controlled trial                                 | high | >20      | adults or most adults | 0.654 | mostly female | ns    | high | mix | ns                                                           | Convenient foods, Cereal and cereal products                                                                                                                                  | multiple | N |           | package | N | N | N | N | N | N | N | N | N | N | Y | Y | N                                      | Y (detailed MTL)                                                                                                                          |
| 57 | 23 | Koenigstorfer 2014 | Germany     | English | 120   | N | N | NFt         | randomized controlled trial                                 | high | 37.8     | adults or most adults | 0.64  | mostly female | ns    | ns   | ns  | ns                                                           | Bread & bakery products, snack foods, Confectionery, Fruit and Vegetables                                                                                                     | multiple | N |           | package | N | N | N | N | N | N | N | N | N | Y | Y | N | Y (detailed MTL)                       |                                                                                                                                           |
| 58 | 24 | Maubach 2014       | New Zealand | English | 768   | Y | N | no label    | choice conjoint task                                        | high | 49.6     | adults or most adults | 0.7   | mostly female | white | low  | ns  | ns                                                           | Cereal and cereal products                                                                                                                                                    | single   | N |           | package | N | N | N | N | N | N | N | N | N | Y | Y | N | Y (detailed MTL)                       |                                                                                                                                           |
| 62 | 25 | Van Herpen 2014a   | Germany     | English | 333   | N | N | NFt         | randomized controlled trial                                 | high | 28       | adults or most adults | 0.52  | mixed         | ns    | high | ns  | students (54%, n = 288), faculty staff, and close dependents | cereal and cereal products, snack foods, Bread & bakery products                                                                                                              | multiple | N |           | package | N | N | N | N | N | N | N | N | N | Y | Y | N | Y (simple MTL)                         |                                                                                                                                           |
| 62 | 25 | Van Herpen 2014b   | Germany     | English | 44    | N | N | no label    | randomized controlled trial                                 | high | 21       | adults or most adults | 0.77  | mostly female | ns    | high | ns  | undergraduate students                                       | Convenient foods, Sauces and spreads                                                                                                                                          | multiple | N |           | package | N | N | N | N | N | N | N | N | N | Y | Y | N | Y (detailed MTL)                       |                                                                                                                                           |

|    |    |                |             |         |       |   |   |            |                             |      |                    |                       |        |               |       |                               |     |                     |                                                                                                                                                           |          |   |         |   |   |   |   |   |   |   |   |   |   |   |                  |                                                                                                                                                                                                                                                                                                                                                                                                                                           |                                                                 |   |
|----|----|----------------|-------------|---------|-------|---|---|------------|-----------------------------|------|--------------------|-----------------------|--------|---------------|-------|-------------------------------|-----|---------------------|-----------------------------------------------------------------------------------------------------------------------------------------------------------|----------|---|---------|---|---|---|---|---|---|---|---|---|---|---|------------------|-------------------------------------------------------------------------------------------------------------------------------------------------------------------------------------------------------------------------------------------------------------------------------------------------------------------------------------------------------------------------------------------------------------------------------------------|-----------------------------------------------------------------|---|
| 64 | 26 | Watson 2014    | Australia   | English | 2175  | Y | N | no label   | randomized controlled trial | high | ≥ 18               | adults or most adults | 0.65   | mostly female | ns    | low                           | mix | ns                  | Cereal and cereal products, Meat and meat products, snack foods, Dairy, Bread & bakery                                                                    | multiple | N | package | N | N | N | N | N | N | N | N | N | N | Y | Y                | N                                                                                                                                                                                                                                                                                                                                                                                                                                         | Y (detailed MTL+interpretive text, detailed MTL+overall rating) | N |
| 67 | 27 | Ducrot 2015    | France      | English | 14230 | N | N | no label   | cross-sectional             | high | ≥ 18               | adults or most adults | 0.7814 | mostly female | ns    | low                           | mix | ns                  | Convenient foods                                                                                                                                          | single   | N | package | N | N | N | N | N | N | N | N | N | N | Y | Y                | N                                                                                                                                                                                                                                                                                                                                                                                                                                         | Y (simple MTL)                                                  | Y |
| 69 | 28 | Hamlin 2015    | New Zealand | English | 250   | N | N | no label   | randomized controlled trial | high | 18-25              | adults or most adults | 0.62   | mostly female | ns    | high                          | ns  | university students | Cereal and cereal products                                                                                                                                | single   | N | package | N | N | N | N | N | N | N | N | N | N | Y | Y                | N                                                                                                                                                                                                                                                                                                                                                                                                                                         | Y (detailed MTL + interpretive texts: sugar, fat)               | N |
| 72 | 29 | Mawad 2015     | Uruguay     | English | 133   | Y | N | no label   | choice conjoint task        | high | 23.3               | adults or most adults | 0.66   | mostly female | ns    | ns                            | ns  | ns                  | Dairy                                                                                                                                                     | single   | N | package | N | N | N | N | N | N | N | N | N | Y | Y | N                | Y (detailed MTL: sugar, fat, salt)                                                                                                                                                                                                                                                                                                                                                                                                        | N                                                               |   |
| 74 | 30 | Pauline 2015   | France      | English | 13578 | N | N | no label   | cross-sectional             | high | ≥ 18               | adults or most adults | 0.524  | mixed         | ns    | low (<50% college in parents) | mix | mix                 | Cereal and cereal products, Fish and fish products, snack foods, Dairy, Convenient cereal and cereal products, snack foods, Dairy, Non-alcoholic beverage | multiple | N | package | N | N | N | N | N | N | N | N | N | N | Y | Y                | N                                                                                                                                                                                                                                                                                                                                                                                                                                         | Y (simple MTL)                                                  | Y |
| 77 | 31 | Siegrist 2015  | Switzerland | English | 61    | N | N | Nf         | randomized controlled trial | high | 35                 | adults or most adults | 0.69   | mostly female | ns    | low (<50% college in parents) | ns  | ns                  | Cereal and cereal products, snack foods, Dairy, Non-alcoholic beverage                                                                                    | multiple | N | package | N | N | N | N | N | N | N | N | N | Y | Y | N                | Y (detailed MTL)                                                                                                                                                                                                                                                                                                                                                                                                                          | N                                                               |   |
| 79 | 32 | Acton 2016     | Canada      | English | 670   | Y | N | no label   | randomized controlled trial | high | 16-24 (50% adults) | mix                   | 0.501  | mixed         | white | ns                            | ns  | ns                  | NS                                                                                                                                                        | NS       | N | package | N | N | N | N | N | N | N | N | N | Y | Y | N                | Y (calorie only, calorie only + interpretive)                                                                                                                                                                                                                                                                                                                                                                                             | N                                                               |   |
| 81 | 33 | Bollard 2016   | New Zealand | English | 604   | N | N | no label   | randomized controlled trial | high | 18 (<50% adults)   | mix                   | 0.51   | mixed         | white | low (<50% college in parents) | mix | ns                  | Non-alcoholic beverages                                                                                                                                   | single   | N | package | Y | Y | Y | Y | Y | N | Y | N | Y | N | N | N                | N                                                                                                                                                                                                                                                                                                                                                                                                                                         | N                                                               |   |
| 82 | 34 | Crosetto 2016b | France      | English | 174   | N | Y | simple TLS | choice conjoint task        | high | ns                 | ns                    | ns     | ns            | ns    | ns                            | ns  | ns                  | restaurant meals                                                                                                                                          | multiple | N | package | N | N | N | N | N | N | N | N | N | Y | Y | N                | Y (simple MTL [saturated fat, sugar, salt], simple MTL [saturated fat, sugar, salt], color-coded GDA [saturated fat, sugar, salt], color-coded GDA [saturated fat, sugar, salt], color-coded GDA [saturated fat, fiber and calcium], color-coded GDA [saturated fat, sugar, salt], color-coded GDA [saturated fat, fiber and calcium]), color-coded GDA [saturated fat, sugar, salt], color-coded GDA [saturated fat, fiber and calcium]) | N                                                               |   |
| 84 | 35 | Ducrot 2016    | France      | English | 7103  | N | N | no label   | randomized controlled trial | high | >18                | adults or most adults | 0.81   | mostly female | ns    | low (<50% college in parents) | mix | ns                  | general food and beverage products                                                                                                                        | multiple | N | package | N | N | N | N | N | N | N | N | N | Y | Y | N                | Y (simple MTL)                                                                                                                                                                                                                                                                                                                                                                                                                            | Y                                                               |   |
| 92 | 36 | Talati 2016    | Australia   | English | 1984  | N | N | no label   | choice conjoint task        | high | >10 (74% adults)   | adults or most adults | 0.5    | mixed         | ns    | ns                            | ns  | ns                  | Convenient foods and                                                                                                                                      | multiple | N | package | N | N | N | N | N | N | N | N | Y | Y | N | Y (detailed MTL) | N                                                                                                                                                                                                                                                                                                                                                                                                                                         |                                                                 |   |

|     |    |                 |             |         |       |   |   |          |                                                     |              |                    |                        |        |               |       |                                             |     |    |                                                                                                                                                                                                                                                       |          |   |         |   |   |   |   |   |   |   |   |   |   |   |   |   |                                              |   |   |   |
|-----|----|-----------------|-------------|---------|-------|---|---|----------|-----------------------------------------------------|--------------|--------------------|------------------------|--------|---------------|-------|---------------------------------------------|-----|----|-------------------------------------------------------------------------------------------------------------------------------------------------------------------------------------------------------------------------------------------------------|----------|---|---------|---|---|---|---|---|---|---|---|---|---|---|---|---|----------------------------------------------|---|---|---|
| 97  | 37 | VanEpps 2016b   | US          | English | 1842  | N | N | no label | randomized controlled trial                         | high         | 15                 | children or adolescent | 0.503  | mixed         | white | low (100% no college, parents <50% college) | ns  | ns | Non-alcoholic beverages                                                                                                                                                                                                                               | single   | N | package | Y | N | Y | N | Y | Y | N | N | Y | N | N | N | N | N                                            | N |   |   |
| 99  | 38 | Arrua 2017a     | Uruguay     | English | 442   | N | N | no label | randomized controlled trial                         | high         | 8--13              | children or adolescent | 0.5    | mixed         | ns    | low (primary school students)               | ns  | ns | Non-alcoholic beverages, snacks, fruits                                                                                                                                                                                                               | multiple | N | package | Y | Y | N | Y | N | N | Y | N | N | Y | Y | N | Y | (detailed MTL)                               | N |   |   |
| 100 | 39 | Arrúa 2017b     | Uruguay     | English | 32    | N | N | TLS      | choice conjoint task                                | high         | >18                | adults or most adults  | ns     | mostly female | ns    | ns                                          | ns  | ns | Meat and meat products, Convenience foods & bakery products, Cereal and cereal products, snack foods, Convenience foods                                                                                                                               | multiple | N | package | Y | Y | N | Y | N | N | Y | N | N | N | N | N | N | N                                            | N |   |   |
| 100 | 39 | Arrúa 2017c     | Uruguay     | English | 260   | N | N | TLS      | randomized controlled trial                         | high         | >18                | adults or most adults  | 0.67   | mostly female | ns    | low (primary school students)               | ns  | ns | cereal products, snack foods, Convenience foods                                                                                                                                                                                                       | multiple | N | package | Y | Y | N | Y | N | N | Y | N | N | N | N | N | N | N                                            | N | N |   |
| 102 | 40 | Boncinelli 2017 | Italy       | English | 96    | N | N | no label | nonequivalent control group design: posttest design | high         | ns                 | ns                     | ns     | mixed         | ns    | ns                                          | ns  | ns | Confectionery                                                                                                                                                                                                                                         | single   | N | package | Y | N | Y | Y | N | Y | N | N | N | N | N | N | N | N                                            | N | N |   |
| 113 | 41 | Julia 2017      | France      | English | 21702 | N | N | no label | cross-sectional                                     | high         | >18                | adults or most adults  | 0.7342 | mostly female | ns    | high (>50% college)                         | mix | ns | general food and beverage products                                                                                                                                                                                                                    | multiple | N | package | N | N | N | N | N | N | N | N | N | Y | Y | N | Y | (detailed MTL)                               | Y |   |   |
| 115 | 42 | Neal 2017       | Australia   | English | 944   | N | N | NFt      | randomized controlled trial                         | high         | 38                 | adults or most adults  | 0.84   | mostly female | ns    | high (>50% college)                         | mix | ns | general food and beverage products                                                                                                                                                                                                                    | multiple | N | package | Y | N | Y | Y | N | N | Y | N | N | Y | Y | N | Y | (detailed MTL)                               | N |   |   |
| 116 | 43 | Ni Mhurchu 2017 | New Zealand | English | 942   | N | N | NFt      | randomized controlled trial                         | high         | 33                 | adults or most adults  | 0.89   | mostly female | mix   | high (>50% college)                         | mix | ns | general food and beverage products                                                                                                                                                                                                                    | multiple | N | package | N | N | N | N | N | N | N | N | N | Y | Y | N | Y | (detailed MTL)                               | N |   |   |
| 121 | 44 | Talati 2017     | Australia   | English | 2058  | Y | N | no label | choice conjoint task                                | high         | >10 (75% adults)   | adults or most adults  | 0.5    | mixed         | ns    | ns                                          | ns  | ns | Dairy, snack foods, Convenience foods                                                                                                                                                                                                                 | multiple | N | package | N | N | N | N | N | N | N | N | N | Y | Y | N | Y | (detailed MTL)                               | N |   |   |
| 122 | 45 | Yoo 2017        | Ecuador     | English | 646   | N | N | no label | choice conjoint task                                | upper-middle | 7--12              | children or adolescent | 0.44   | mixed         | ns    | ns                                          | mix | ns | Dairy                                                                                                                                                                                                                                                 | single   | N | package | N | N | N | N | N | N | N | N | N | Y | Y | N | Y | (detailed MTL + interpretative texts: sinar) | N |   |   |
| 123 | 46 | Acton 2018a     | Canada      | English | 675   | N | N | no label | randomized controlled trial                         | high         | >16 (84.9% adults) | adults or most adults  | 0.539  | mixed         | white | ns                                          | ns  | ns | Non-alcoholic beverages                                                                                                                                                                                                                               | single   | N | package | Y | N | Y | Y | Y | N | Y | N | Y | N | N | N | N | N                                            | N | N |   |
| 126 | 47 | Acton 2018b     | Canada      | English | 358   | Y | N | no label | randomized controlled trial                         | high         | >16 (84.9% adults) | adults or most adults  | 0.539  | mixed         | white | ns                                          | ns  | ns | Non-alcoholic beverages, Dairy Bread & bakery products                                                                                                                                                                                                | multiple | N | package | N | N | N | N | N | N | N | N | N | Y | Y | N | Y | (sugar only)                                 | N |   |   |
| 127 | 48 | Ares 2018a      | Uruguay     | English | 306   | N | N | no label | choice conjoint task                                | high         | >18                | adults or most adults  | 0.63   | mostly female | ns    | ns                                          | ns  | ns | Dairy Bread & bakery products, Fruit and vegetables, snack foods, Meat and meat products, Bread & bakery products, Non-alcoholic Dairy, Bread & bakery products, Cereal and cereal products, Sauces and spreads, snack foods, Non-alcoholic beverages | multiple | N | package | Y | Y | N | Y | N | N | Y | N | N | N | N | N | N | N                                            | N | N | N |
| 128 | 49 | Ares 2018b      | Uruguay     | English | 395   | N | N | no label | one-group design: pretest-posttest design           | high         | >18                | adults or most adults  | 0.72   | mostly female | ns    | ns                                          | ns  | ns | Meat and meat products, Bread & bakery products, Non-alcoholic Dairy, Bread & bakery products, Cereal and cereal products, Sauces and spreads, snack foods, Non-alcoholic beverages                                                                   | multiple | N | package | Y | Y | N | Y | N | N | Y | N | N | N | N | N | N | N                                            | N | N | N |
| 130 | 50 | Ares 2018c      | Uruguay     | English | 112   | N | N | NS       | choice conjoint task                                | high         | >18                | adults or most adults  | 0.7    | mostly female | ns    | ns                                          | ns  | ns | Meat and meat products, Bread & bakery products, Non-alcoholic Dairy, Bread & bakery products, Cereal and cereal products, Sauces and spreads, snack foods, Non-alcoholic beverages                                                                   | multiple | N | package | Y | Y | N | Y | N | N | Y | N | N | Y | N | N | N | N                                            | N | Y | N |

| Study ID | Year | Author               | Country                       | Language | N          | Label | Design   | Quality                        | Age          | Sample | Gender                | Education | Income        | Occupation | Product                                                                                                                                     | Setting  | Label | Calorie   | Health  | Other | Outcome | MTL | Notes |   |   |   |   |   |   |                                                                                   |                  |   |
|----------|------|----------------------|-------------------------------|----------|------------|-------|----------|--------------------------------|--------------|--------|-----------------------|-----------|---------------|------------|---------------------------------------------------------------------------------------------------------------------------------------------|----------|-------|-----------|---------|-------|---------|-----|-------|---|---|---|---|---|---|-----------------------------------------------------------------------------------|------------------|---|
| 130      | 50   | Ares 2018d           | Uruguay                       | English  | 681        | N     | no label | randomized controlled trial    | high         | >18    | adults or most adults | 0.67      | mostly female | ns         | Fruit and vegetables, Bread & bakery products, Cereal and cereal products, Dairy, Non-alcoholic beverages, snack foods, Sauces              | multiple | N     | package   | Y       | Y     | N       | Y   | N     | N | Y | N | N | Y | N | N                                                                                 | N                | Y |
| 132      | 51   | Billich 2018         | Australia                     | English  | 581        | N     | no label | randomized controlled trial    | high         | >18    | adults or most adults | 0.5       | mixed         | ns         | Non-alcoholic beverages, Non-alcoholic beverages                                                                                            | single   | N     | package   | Y       | N     | Y       | N   | Y     | Y | Y | N | Y | N | N | N                                                                                 | N                | N |
| 136      | 52   | David 2018           | Brazil                        | English  | 98         | N     | no label | choice conjoint task           | upper-middle | 20.2   | adults or most adults | 0.53      | mixed         | ns         | s, Confectionery, snack foods, Non-alcoholic beverages                                                                                      | multiple | N     | package   | Y       | N     | Y       | Y   | Y     | Y | Y | N | Y | N | N | N                                                                                 | N                | N |
| 137      | 53   | Donnelly 2018b       | US                            | English  | sales data | N     | no label | Interrupted Time-Series Design | high         |        |                       |           |               |            | Non-alcoholic beverages                                                                                                                     | single   | Y     | cafeteria | package | Y     | N       | Y   | N     | Y | Y | Y | N | Y | N | N                                                                                 | N                | N |
| 137      | 53   | Donnelly 2018a       | US                            | English  | 202        | N     | no label | randomized controlled trial    | high         | 33.86  | adults or most adults | 0.488     | mixed         | white      | Non-alcoholic beverages                                                                                                                     | single   | N     | package   | Y       | N     | Y       | N   | Y     | Y | Y | N | Y | N | N | N                                                                                 | N                | N |
| 138      | 54   | Egnell 2018a         | France                        | English  | 3751       | N     | no label | choice conjoint task           | high         | 49.4   | adults or most adults | 0.814     | mostly female | ns         | Fish and fish products, Bread & bakery products, Cereal and cereal products, Convenience bread & bakery products, Dairy, Sauces and spreads | multiple | N     | package   | N       | N     | N       | N   | N     | N | N | N | N | Y | Y | N                                                                                 | Y (detailed MTL) |   |
| 139      | 55   | Egnell 2018b         | France                        | English  | 25772      | N     | no label | choice conjoint task           | high         | 56.05  | adults or most adults | 0.73      | mostly female | ns         | Cereal and cereal products, Dairy, Sauces and spreads                                                                                       | multiple | N     | package   | N       | N     | N       | N   | N     | N | N | N | N | Y | Y | N                                                                                 | Y (detailed MTL) |   |
| 144      | 56   | Goodman 2018         | Canada, US, Australia, and UK | English  | 11617      | N     | no label | randomized controlled trial    | high         | >18    | adults or most adults | 0.529     | mixed         | ns         | Cereal and cereal products, Dairy, Cereal and cereal products, Convenience foods, Non-alcoholic beverages                                   | single   | N     | package   | Y       | N     | Y       | Y   | N     | N | Y | N | N | N | N | N                                                                                 | N                | N |
| 145      | 57   | Gorski Findling 2018 | US                            | English  | 628        | N     | no label | randomized controlled trial    | high         | 43.4   | adults or most adults | 0.54      | mixed         | white      | Convenience foods, Non-alcoholic beverages                                                                                                  | multiple | N     | package   | N       | N     | N       | N   | N     | N | N | N | Y | Y | N | Y (simple MTL: calorie only; simple MTL + interpretative texts: sugar, fat, salt) |                  |   |
| 149      | 58   | Khandpur 2018        | Brazil                        | English  | 1607       | N     | TLS      | randomized controlled trial    | upper-middle | 39.2   | adults or most adults | 0.5246    | mixed         | ns         | Bread & bakery products, Cereal and cereal products, Convenience foods, snack foods, Non-alcoholic beverages                                | multiple | N     | package   | Y       | N     | Y       | Y   | N     | N | Y | N | N | Y | Y | N                                                                                 | Y (detailed MTL) |   |

|     |    |                        |           |         |            |   |   |          |                                |              |                    |                       |       |               |         |                     |     |    |                                                                   |                                                                                                                 |          |   |           |         |   |   |   |   |   |   |   |   |   |   |   |                                                          |                                                                                                               |   |
|-----|----|------------------------|-----------|---------|------------|---|---|----------|--------------------------------|--------------|--------------------|-----------------------|-------|---------------|---------|---------------------|-----|----|-------------------------------------------------------------------|-----------------------------------------------------------------------------------------------------------------|----------|---|-----------|---------|---|---|---|---|---|---|---|---|---|---|---|----------------------------------------------------------|---------------------------------------------------------------------------------------------------------------|---|
| 152 | 59 | Lima 2018              | Brazil    | English | 396        | N | N | TLS      | randomized controlled trial    | upper-middle | >6 (46.8% adults)  | mix                   | 0.648 | mostly female | ns      |                     |     |    |                                                                   | Cereal and cereal products, Bread & bakery products, Confectionery, snack foods, Dairy, Non-alcoholic beverages | multiple | N |           | package | Y | Y | N | Y | N | N | Y | N | N | Y | Y | N                                                        | Y (simple MTL + interpretative text: calories, sugar, saturated fat and sodium)                               | N |
| 154 | 60 | Machin 2018a           | Uruguay   | English | 437        | N | N | no label | randomized controlled trial    | high         | >18                | adults or most adults | 0.75  | mostly female | ns      | low (<50% college)  | ns  | ns | general food and beverage products                                | multiple                                                                                                        | N        |   | package   | Y       | Y | N | Y | N | N | Y | N | N | Y | Y | N | Y (detailed MTL + interpretative text: sugar, fat, salt) | N                                                                                                             |   |
| 155 | 61 | Machin 2018c           | Uruguay   | English | 216        | N | N | TLS      | choice conjoint task           | high         | >18                | adults or most adults | 0.75  | mostly female | ns      | ns                  | ns  | ns | NS                                                                | NS                                                                                                              | N        |   | package   | Y       | Y | N | Y | N | N | Y | N | N | Y | Y | N | Y (simple MTL + interpretative text: sugar, fat, salt)   | N                                                                                                             |   |
| 155 | 61 | Machin 2018b           | Uruguay   | English | 1003       | N | N | TLS      | randomized controlled trial    | high         | >18                | adults or most adults | 0.75  | mostly female | ns      | ns                  | ns  | ns | Bread & bakery products, Meat and meat products, Dairy            | multiple                                                                                                        | N        |   | package   | Y       | Y | N | Y | N | N | Y | N | N | Y | Y | N | Y (simple MTL + interpretative text: sugar, fat, salt)   | N                                                                                                             |   |
| 156 | 62 | Machin 2018d           | Uruguay   | English | 1182       | N | N | no label | randomized controlled trial    | high         | >18                | adults or most adults | 0.91  | mostly female | ns      | low (<50% college)  | ns  | ns | general food and beverage products                                | multiple                                                                                                        | N        |   | package   | Y       | Y | N | Y | N | N | Y | N | N | Y | Y | N | (detailed MTL + interpretative text: sugar, saturated    | N                                                                                                             |   |
| 158 | 63 | Mantzari 2018          | UK        | English | 997        | N | N | no label | randomized controlled trial    | high         | 43.8               | adults or most adults | 0.481 | mixed         | white   | high (>50% college) | ns  | ns | Non-alcoholic beverages                                           | single                                                                                                          | N        |   | package   | Y       | N | Y | Y | Y | N | Y | N | Y | N | N | N | N                                                        | N                                                                                                             |   |
| 160 | 64 | Mazza 2018             | US        | English | sales data | N | N | no label | Interrupted Time-Series Design | high         |                    |                       |       |               |         |                     |     |    | campus/workplace cafeteria meal                                   | multiple                                                                                                        | Y        |   | cafeteria | package | N | N | N | N | N | N | N | N | N | Y | Y | N                                                        | Y (simple MTL + interpretative text: calories, fat, saturated fat, trans fat, cholesterol, sodium, potassium) | N |
| 161 | 65 | Moran 2018             | US        | English | 1970       | N | N | no label | randomized controlled trial    | high         | 36.2               | adults or most adults | 0.7   | mostly female | white   | low (<50% college)  | mix | ns | Non-alcoholic beverages                                           | single                                                                                                          | N        |   | package   | Y       | N | Y | N | Y | Y | N | N | Y | N | N | N | N                                                        | N                                                                                                             |   |
| 172 | 66 | Talati 2018a           | Australia | English | 690        | Y | N | no label | randomized controlled trial    | high         | >10 (72% adults)   | adults or most adults | 0.51  | mixed         | ns      |                     |     |    | Cereal and cereal products, Convenience foods, snack foods, Dairy | multiple                                                                                                        | N        |   | package   | N       | N | N | N | N | N | N | N | N | Y | Y | N | Y (detailed MTL)                                         | N                                                                                                             |   |
| 173 | 67 | Talati 2018b           | Australia | English | 1505       | N | N | no label | choice conjoint task           | high         | >18                | adults or most adults | 0.5   | mixed         | ns      |                     |     |    | Cereal and cereal products, Convenience foods, snack foods, Dairy | multiple                                                                                                        | N        |   | package   | N       | N | N | N | N | N | N | N | N | Y | Y | N | Y (detailed MTL)                                         | N                                                                                                             |   |
| 177 | 68 | Acton 2019             | Canada    | English | 2866       | N | N | no label | randomized controlled trial    | high         | >13 (84.7% adults) | adults or most adults | 0.56  | mixed         | mix     | high (>50% college) | mix | ns | Non-alcoholic beverages, snack foods, bread                       | multiple                                                                                                        | N        |   | package   | Y       | N | Y | Y | N | N | N | N | N | Y | Y | N | Y (detailed MTL)                                         | Y                                                                                                             |   |
| 178 | 69 | Alonso-Dos-Santos 2019 | Chile     | English | 337        | N | N | NFt      | randomized controlled trial    | high         | 23.4               | adults or most adults | 0.5   | mixed         | ns      | ns                  | ns  | ns | bread and bakery products, snack foods, Dairy                     | multiple                                                                                                        | N        |   | package   | Y       | Y | N | Y | N | N | Y | N | N | N | N | N | N                                                        | N                                                                                                             |   |
| 179 | 70 | Ang 2019               | Singapore | English | 512        | Y | N | no label | randomized controlled trial    | high         | 38.1               | adults or most adults | 0.467 | mixed         | Chinese | ns                  | ns  | ns | general food and beverage products                                | multiple                                                                                                        | N        |   | package   | Y       | Y | Y | Y | Y | N | N | N | Y | N | N | N | N                                                        | N                                                                                                             |   |

|     |    |                        |           |         |      |   |   |                           |                                                     |              |                 |                       |        |               |       |                     |     |                                                 |                                                                  |          |   |         |   |   |   |   |   |   |   |   |   |   |   |                                                |                                                  |   |   |
|-----|----|------------------------|-----------|---------|------|---|---|---------------------------|-----------------------------------------------------|--------------|-----------------|-----------------------|--------|---------------|-------|---------------------|-----|-------------------------------------------------|------------------------------------------------------------------|----------|---|---------|---|---|---|---|---|---|---|---|---|---|---|------------------------------------------------|--------------------------------------------------|---|---|
| 185 | 71 | Egnell 2019a           | France    | English | 352  | Y | N | no label                  | randomized controlled trial                         | high         | >18             | adults or most adults | 0.797  | mostly female | ns    | high (>50% college) | mix | mix (>50% intermediate profession/office staff) | general food and beverage products                               | multiple | N | package | N | N | N | N | N | N | N | N | N | Y | Y | N                                              | Y (detailed MTL)                                 | Y |   |
| 188 | 72 | Galan 2019             | Spain     | Spanish | 1000 | N | N | no label                  | randomized controlled trial                         | high         | >18             | adults or most adults | 0.5    | mixed         | ns    | low (<50% college)  | mix | ns                                              | Cereal and cereal products, Bread & bakery products, Convenience | multiple | N | package | Y | Y | N | Y | N | N | Y | N | N | Y | Y | N                                              | Y (detailed MTL)                                 | Y |   |
| 189 | 73 | Grummon 2019a          | US        | English | 1360 | N | N | no label                  | randomized controlled trial                         | high         | 37.4            | adults or most adults | 0.47   | mixed         | white | high (>50% college) | mix | ns                                              | Non-alcoholic beverages                                          | single   | N | package | Y | Y | Y | Y | Y | N | Y | N | Y | N | N | N                                              | N                                                | N |   |
| 191 | 74 | Hayward 2019           | US        | English | 681  | N | N | no label                  | randomized controlled trial                         | high         | 41.38           | adults or most adults | 0.49   | mixed         | white | high (>50% college) | ns  | ns                                              | Non-alcoholic beverages                                          | single   | N | package | Y | N | Y | N | Y | N | Y | N | Y | N | N | N                                              | N                                                | N |   |
| 193 | 75 | Karamanos 2019         | Canada    | English | 242  | N | N | NfT                       | cross-sectional                                     | high         | >25             | adults or most adults | 0.5372 | mixed         | ns    | high (>50% college) | ns  | ns                                              | NS                                                               | NS       | N | package | N | N | N | N | N | N | N | N | Y | Y | N | Y (detailed MTL)                               | N                                                |   |   |
| 196 | 76 | Lima 2019              | Brazil    | English | 800  | Y | N | TLS                       | randomized controlled trial                         | upper-middle | >6 (50% adults) | mix                   | 0.59   | mixed         | ns    | ns                  | ns  | ns                                              | Sugars, honey and related products, Dairy                        | multiple | N | package | Y | Y | N | Y | N | N | Y | N | N | Y | Y | N                                              | Y (detailed MTL + interpretative texts: summary) | N |   |
| 198 | 77 | Machin 2019            | Uruguay   | English | 199  | N | N | no label                  | randomized controlled trial                         | high         | >18             | adults or most adults | 0.66   | mostly female | ns    | high (>50% college) | ns  | ns                                              | snack foods                                                      | single   | N | package | Y | Y | N | Y | N | N | Y | N | N | N | N | N                                              | N                                                | N |   |
| 199 | 78 | Marette 2019           | France    | English | 86   | N | N | no label                  | one-group design: pretest-posttest design           | high         | 38.45           | adults or most adults | 0.744  | mostly female | ns    | ns                  | low |                                                 | Cereal and cereal products                                       | single   | N | package | N | N | N | N | N | N | N | N | Y | N | N | N                                              | N                                                | Y |   |
| 206 | 79 | Popova 2019            | US        | English | 180  | N | N | no label                  | randomized controlled trial                         | high         | 25.6            | adults or most adults | 0.739  | mostly female | mix   | high (>50% college) | mix | ns                                              | Non-alcoholic beverages                                          | single   | N | package | Y | N | Y | N | Y | Y | N | N | Y | N | N | N                                              | N                                                | N |   |
| 208 | 80 | Rosenblatt 2019a       | Australia | English | 100  | N | N | textual warning           | randomized controlled trial                         | high         | 27.59           | adults or most adults | 0.74   | mostly female | ns    | ns                  | ns  | ns                                              | snack foods                                                      | single   | N | package | Y | Y | Y | Y | Y | Y | Y | Y | Y | Y | N | N                                              | N                                                | N | N |
| 208 | 80 | Rosenblatt 2019b       | Australia | English | 43   | N | N | positively framed warning | randomized controlled trial                         | high         | 24.85           | adults or most adults | 0.58   | mixed         | ns    | ns                  | ns  | ns                                              | snack foods                                                      | single   | N | package | Y | Y | Y | Y | Y | Y | Y | Y | Y | N | N | N                                              | N                                                | N |   |
| 210 | 81 | Schnettler 2019a       | Chile     | English | 245  | N | N | no label                  | choice conjoint task                                | high         | 39.4            | adults or most adults | 0.77   | mostly female | ns    |                     |     |                                                 | Meat and meat products                                           | single   | N | package | Y | Y | N | Y | N | N | Y | N | N | N | N | N                                              | N                                                | N | N |
| 210 | 81 | Schnettler 2019b       | Chile     | English | 249  | N | N | no label                  | choice conjoint task                                | high         | 40.4            | adults or most adults | 0.746  | mostly female | ns    |                     |     |                                                 | Meat and meat products                                           | single   | N | package | Y | Y | N | Y | N | N | Y | N | N | N | N | N                                              | N                                                | N | N |
| 211 | 82 | Schnettler 2019        | Chile     | English | 548  | N | N | no label                  | one-group design: pretest-posttest design           | high         | 40              | adults or most adults | 0.724  | mostly female | ns    |                     |     |                                                 | Meat and meat products                                           | single   | N | package | Y | Y | N | Y | N | N | Y | N | N | N | N | N                                              | N                                                | N | N |
| 216 | 83 | Velasco Vizcaino 2019d | Ecuador   | English | 133  | N | N | NfT                       | nonequivalent control group design: posttest design | upper-middle | 24.83           | adults or most adults | 0.38   | mostly male   | ns    | ns                  | ns  | ns                                              | Dairy                                                            | single   | N | package | N | N | N | N | N | N | N | N | Y | Y | N | Y (simple MTL + interpretative texts: summary) | N                                                |   |   |
| 216 | 83 | Velasco Vizcaino 2019a | Ecuador   | English | 837  | N | N | no label                  | randomized controlled trial                         | upper-middle | 28.79           | adults or most adults | 0.53   | mixed         | ns    | ns                  | ns  | ns                                              | Meat and meat products                                           | single   | N | package | N | N | N | N | N | N | N | N | Y | Y | N | Y (simple MTL + interpretative texts: summary) | N                                                |   |   |
| 216 | 83 | Velasco Vizcaino 2019b | Ecuador   | English | 181  | N | N | no label                  | randomized controlled trial                         | upper-middle | 37.24           | adults or most adults | 0.467  | mixed         | ns    | ns                  | ns  | ns                                              | snack foods                                                      | single   | N | package | N | N | N | N | N | N | N | N | Y | Y | N | Y (simple MTL + interpretative texts: summary) | N                                                |   |   |
| 216 | 83 | Velasco Vizcaino 2019c | Ecuador   | English | 201  | N | N | no label                  | randomized controlled trial                         | upper-middle | 37.85           | adults or most adults | 0.711  | mostly female | ns    | ns                  | ns  | ns                                              | Confectionery                                                    | single   | N | package | N | N | N | N | N | N | N | N | Y | Y | N | Y (simple MTL + interpretative texts: summary) | N                                                |   |   |
| 218 | 84 | Nobrega 2020           | Brazil    | English | 820  | N | N | no label                  | choice conjoint task                                | upper-middle | >18             | adults or most adults | 0.52   | mixed         | ns    | low (<50% college)  | mix | ns                                              | Non-alcoholic beverages, Bread & bakery products, snack foods    | multiple | N | package | Y | Y | N | Y | N | N | Y | N | N | N | N | N                                              | N                                                | N |   |

|     |    |                  |                                                                                                                          |         |      |   |   |          |                                           |                     |                   |                       |        |               |         |                      |                                 |                        |                                                                       |          |   |        |         |   |   |   |   |   |   |   |   |   |   |   |                  |                                                                                                                |                                                                   |   |
|-----|----|------------------|--------------------------------------------------------------------------------------------------------------------------|---------|------|---|---|----------|-------------------------------------------|---------------------|-------------------|-----------------------|--------|---------------|---------|----------------------|---------------------------------|------------------------|-----------------------------------------------------------------------|----------|---|--------|---------|---|---|---|---|---|---|---|---|---|---|---|------------------|----------------------------------------------------------------------------------------------------------------|-------------------------------------------------------------------|---|
| 229 | 85 | Bix 2015         | US                                                                                                                       | English | 55   | Y | N | no label | choice conjoint task                      | high                | 36.6              | adults or most adults | 0.6    | mixed         | mix     | low (<50% college)   | low (>50% low household income) | ns                     | Cereal and cereal products, snack foods                               | multiple | N |        | package | N | N | N | N | N | N | N | N | N | N | Y | Y                | N                                                                                                              | Y (detailed MTL + facial icons: total fat, saturated fat, sugars) | N |
| 231 | 86 | Hobin 2015       | Canada                                                                                                                   | English | 1005 | Y | N | no label | randomized controlled trial               | high                | 16-24 (50% 16-18) | mix                   | 0.5    | mixed         | white   | low (<50% college)   | ns                              | ns                     | snack foods                                                           | single   | N |        | package | N | N | N | N | N | N | N | N | N | N | Y | Y                | N                                                                                                              | Y (detailed MTL: calories, total fat, saturated fat, sodium)      | N |
| 237 | 87 | Egnell 2019b     | France                                                                                                                   | English | 1215 | N | N | no label | randomized controlled trial               | high                | 20.4              | adults or most adults | 0.73   | mostly female | ns      | high (>51% college)  | ns                              | undergraduate students | general food and beverage products                                    | multiple | N |        | package | N | N | N | N | N | N | N | N | N | Y | N | N                | N                                                                                                              | Y                                                                 |   |
| 242 | 88 | Poquet 2019      | France                                                                                                                   | English | 95   | N | N | no label | one-group design: pretest-posttest design | high                | 9.38              | adults or most adults | 0.568  | mixed         | ns      | low (primary school) | mix                             | primary school student | snack foods                                                           | multiple | N |        | package | N | N | N | N | N | N | N | N | N | Y | N | N                | N                                                                                                              | Y                                                                 |   |
| 244 | 89 | Trudel 2015a     | US                                                                                                                       | English | 123  | Y | N | no label | randomized controlled trial               | high                | 19.93             | adults or most adults | 0.54   | mixed         | ns      | high (>50% college)  | ns                              | undergraduate students | Convenient foods                                                      | single   | N |        | package | N | N | N | N | N | N | N | N | N | Y | Y | N                | Y (detailed MTL: total fat, saturated fat, trans fatty acids, cholesterol, sodium, carbohydrate rates, sugars) | N                                                                 |   |
| 244 | 89 | Trudel 2015b     | US                                                                                                                       | English | 227  | Y | N | no label | randomized controlled trial               | high                | >18               | adults or most adults | 0.57   | mixed         | ns      | high (>51% college)  | ns                              | undergraduate students | Convenient foods                                                      | single   | N |        | package | N | N | N | N | N | N | N | N | N | Y | Y | N                | Y (detailed MTL: total fat, saturated fat, trans fatty acids, cholesterol, sodium, carbohydrate rates, sugars) | N                                                                 |   |
| 245 | 90 | Crockett 2014    | UK                                                                                                                       | English | 184  | N | N | no label | randomized controlled trial               | high                | >18               | adults or most adults | 0.64   | mostly female | ns      |                      |                                 |                        | snack foods                                                           | single   | Y | cinema | package | N | N | N | N | N | N | N | N | N | Y | Y | N                | Y (fat only: only green, only red)                                                                             | N                                                                 |   |
| 252 | 91 | Egnell 2019c     | Germany                                                                                                                  | English | 600  | N | N | no label | randomized controlled trial               | high                | >18               | adults or most adults | 0.5    | mixed         | ns      | low (<50% college)   | mix (33% high, 33% low)         | ns                     | Bread & bakery products, Convenient foods                             | multiple | N |        | package | Y | Y | N | Y | N | N | Y | N | N | Y | Y | N                | Y (detailed MTL)                                                                                               | Y                                                                 |   |
| 253 | 92 | Finkelstein 2019 | Singapore                                                                                                                | English | 154  | Y | N | no label | randomized controlled trial               | high                | 34.4              | adults or most adults | 0.6883 | mostly female | Chinese | high (>50% college)  | mix                             | ns                     | general food and beverage products                                    | multiple | N |        | package | N | N | N | N | N | N | N | N | Y | Y | N | Y (detailed MTL) | Y                                                                                                              |                                                                   |   |
| 255 | 93 | Grummon 2019b    | US                                                                                                                       | English | 400  | N | N | no label | randomized controlled trial               | high                | 29                | adults or most adults | 0.6    | mixed         | mix     | high (>50% college)  | mix                             | ns                     | Non-alcoholic beverages                                               | single   | N |        | package | Y | N | Y | N | Y | N | Y | N | Y | N | N | N                | N                                                                                                              | N                                                                 | N |
| 261 | 94 | Nieto 2019       | US and Mexico                                                                                                            | English | 7159 | N | N | NfT      | cross-sectional                           | high & upper-middle | >18               | adults or most adults | 0.5    | mixed         | mix     | high (>50% college)  | mix (>50% worker and student)   | NS                     | NS                                                                    | N        |   |        | package | Y | Y | N | Y | N | N | Y | N | N | Y | Y | N                | Y (detailed MTL)                                                                                               | N                                                                 |   |
| 264 | 95 | Talati 2019a     | 12 countries (Argentina, Australia, Bulgaria, Canada, Denmark, France, Germany, Mexico, Singapore, Spain, the UK and the | English | 6660 | N | N | no label | randomized controlled trial               | high & upper-middle | >18               | adults or most adults | 0.5    | mixed         | ns      | ns                   | ns                              | ns                     | Cereal and cereal products, Bread & bakery products, Convenient foods | multiple | N |        | package | Y | Y | N | Y | N | N | Y | N | N | Y | Y | N                | Y (detailed MTL)                                                                                               | Y                                                                 |   |



|     |     |                      |                                                                                                                          |         |      |   |   |            |                                                     |                     |       |                        |      |               |       |                     |                         |                        |                                                                                               |          |         |                                 |         |   |   |   |   |   |   |   |   |   |   |                  |                    |   |
|-----|-----|----------------------|--------------------------------------------------------------------------------------------------------------------------|---------|------|---|---|------------|-----------------------------------------------------|---------------------|-------|------------------------|------|---------------|-------|---------------------|-------------------------|------------------------|-----------------------------------------------------------------------------------------------|----------|---------|---------------------------------|---------|---|---|---|---|---|---|---|---|---|---|------------------|--------------------|---|
| 265 | 96  | Talati 2019b         | 12 countries (Argentina, Australia, Bulgaria, Canada, Denmark, France, Germany, Mexico, Singapore, Spain, the UK and the | English | 7087 | N | N | TLS        | randomized controlled trial                         | high & upper-middle | >18   | adults or most adults  | 0.5  | mixed         | ns    | ns                  | mix (33% high, 33% low) | NS                     | NS                                                                                            | N        | package | Y                               | Y       | N | Y | N | N | Y | N | N | Y | Y | N | Y (detailed MTL) |                    |   |
| 268 | 97  | Mantzari 2020        | UK                                                                                                                       | English | 270  | N | N | no label   | randomized controlled trial                         | high                | 40    | adults or most adults  | 0.56 | mixed         | white |                     |                         | Non-alcoholic beverage | single                                                                                        | N        | package | Y                               | N       | Y | N | Y | N | Y | N | Y | N | N | N | N                |                    |   |
| 271 | 98  | Anabtawi 2020        | Peru                                                                                                                     | English | 100  | N | N | no label   | randomized controlled trial                         | upper-middle        | 19.81 | adults or most adults  | 0.53 | mixed         | ns    | high (100% college) | ns                      | ns                     | Non-alcoholic beverage & snack Cereal and cereal products, Bread & bakery products            | multiple | N       | package                         | N       | N | N | N | N | N | N | N | N | Y | Y | N                | Y (detailed MTL)   |   |
| 275 | 99  | Egnell 2020a         | Switzerland                                                                                                              | English | 600  | N | N | TLS        | randomized controlled trial                         | high                | >18   | adults or most adults  | 0.49 | mixed         | ns    | low                 | mixed                   | ns                     | Non-alcoholic beverage & bakery products                                                      | multiple | N       | package                         | Y       | Y | N | Y | N | N | Y | N | N | Y | Y | N                | Y (detailed MTL)   |   |
| 276 | 100 | Franco-Arellano 2020 | Canada                                                                                                                   | English | 1498 | Y | N | no label   | randomized controlled trial                         | high                | >18   | adults or most adults  | 0.52 | mixed         | white | high                | mixed                   | ns                     | Non-alcoholic beverage & snack                                                                | multiple | N       | package                         | Y       | N | Y | Y | N | N | Y | N | N | Y | Y | N                | Y (simplified MTL) |   |
| 279 | 101 | Gabor 2019           | Spain                                                                                                                    | English | 50   | N | N | NS         | randomized controlled trial                         | high                | 21.3  | adults or most adults  | 0.64 | mostly female | ns    | ns                  | ns                      | ns                     | Confectionery                                                                                 | single   | N       | package                         | N       | N | N | N | N | N | N | N | Y | Y | N | Y (detailed MTL) |                    |   |
| 280 | 102 | Hagmann 2020         | Switzerland                                                                                                              | English | 799  | N | N | no label   | randomized controlled trial                         | high                | 48.7  | adults or most adults  | 0.54 | mixed         | ns    | low                 | ns                      | ns                     | snack foods                                                                                   | single   | N       | package                         | N       | N | N | N | N | N | N | N | Y | Y | N | Y (detailed MTL) |                    |   |
| 282 | 103 | Hall 2020a           | US                                                                                                                       | English | 1352 | N | N | textual HW | randomized controlled trial                         | high                | 37    | adults or most adults  | 0.47 | mixed         | white | high                | mixed                   | ns                     | Non-alcoholic beverage                                                                        | single   | N       | package                         | Y       | N | Y | N | Y | Y | Y | N | Y | N | N | N                | N                  |   |
| 283 | 104 | Hall 2020b           | US                                                                                                                       | English | 2139 | N | N | no label   | randomized controlled trial                         | high                | 43    | adults or most adults  | 0.45 | mixed         | white | low                 | mixed                   | ns                     | Non-alcoholic beverage                                                                        | single   | N       | package                         | Y       | N | Y | N | Y | Y | N | N | Y | N | N | N                | N                  |   |
| 283 | 104 | Hall 2020c           | US                                                                                                                       | English | 670  | N | N | no label   | randomized controlled trial                         | high                | 37    | adults or most adults  | 0.49 | mixed         | white | low                 | mixed                   | ns                     | Non-alcoholic beverage                                                                        | single   | N       | package                         | Y       | N | Y | N | Y | Y | N | N | Y | N | N | N                | N                  |   |
| 283 | 104 | Hall 2020d           | US                                                                                                                       | English | 1001 | N | N | no label   | randomized controlled trial                         | high                | 39    | adults or most adults  | 0.46 | mixed         | white | high                | mixed                   | ns                     | Non-alcoholic beverage                                                                        | single   | N       | package                         | Y       | N | Y | N | Y | Y | N | N | Y | N | N | N                | N                  |   |
| 284 | 105 | Hernández-Nava 2020  | Mexico                                                                                                                   | Spanish | 600  | N | N | no label   | randomized controlled trial                         | upper-middle        | >18   | adults or most adults  | 0.5  | mixed         | ns    | high                | mixed                   | ns                     | Cereal and cereal products, Bread and bakery products                                         | multiple | N       | package                         | Y       | Y | N | Y | N | N | Y | N | N | Y | Y | N                | Y (detailed MTL)   |   |
| 285 | 106 | Jáuregui 2020        | Mexico                                                                                                                   | English | 1469 | N | N | TLS        | randomized controlled trial                         | upper-middle        | >21   | adults or most adults  | 0.43 | mixed         | ns    | low                 | ns                      | mixed                  | Non-alcoholic beverage, dairy, Bread and bakery products, snack foods, non-alcoholic beverage | multiple | N       | package                         | Y       | Y | N | Y | N | N | Y | N | N | Y | Y | N                | Y (detailed MTL)   |   |
| 289 | 107 | Retno 2019           | Indonesia                                                                                                                | English | 41   | Y | N | no label   | nonequivalent control group design: posttest design | lower-middle        | 15-17 | children or adolescent | 1    | mostly female | ns    | low                 | ns                      | ns                     | Bread and bakery products, dairy                                                              | multiple | N       | package                         | N       | N | N | N | N | N | N | N | N | Y | Y | N                | Y (detailed MTL)   |   |
| 291 | 108 | Taillie 2020a        | Chile                                                                                                                    | English | 2383 | Y | N | no label   | one-group design: pretest-posttest design           | high                | ns    | ns                     | ns   | mixed         | ns    | low                 | mixed                   | ns                     | Non-alcoholic beverage                                                                        | single   | Y       | supermarkets and grocery stores | package | Y | Y | N | Y | N | N | Y | N | N | N | N                | N                  | N |
| 292 | 109 | Uribe 2020           | Chile                                                                                                                    | English | 320  | N | N | no label   | randomized controlled trial                         | high                | ns    | ns                     | ns   | ns            | ns    | ns                  | ns                      | ns                     | Non-alcoholic beverage, Cereal and cereal products, snack, condiments                         | multiple | N       | package                         | Y       | Y | N | Y | N | N | Y | N | N | N | N | N                | N                  | N |

|     |     |                   |                       |         |      |   |   |          |                                                            |              |           |                               |           |               |       |      |       |       |                                                                      |                                                                                         |          |         |         |   |   |   |   |   |   |   |   |   |   |   |                  |                  |                  |   |
|-----|-----|-------------------|-----------------------|---------|------|---|---|----------|------------------------------------------------------------|--------------|-----------|-------------------------------|-----------|---------------|-------|------|-------|-------|----------------------------------------------------------------------|-----------------------------------------------------------------------------------------|----------|---------|---------|---|---|---|---|---|---|---|---|---|---|---|------------------|------------------|------------------|---|
| 293 | 110 | Vandevijvere 2020 | Belgium               | English | 600  | N | N | NS       | randomized controlled trial                                | high         | >18       | adults or most adults         | 0.5       | mixed         | ns    | high | mixed | ns    | Cereal and cereal products, Bread and bakery products                | multiple                                                                                | N        | package | Y       | Y | N | Y | N | N | Y | N | N | Y | Y | N | Y (detailed MTL) |                  |                  |   |
| 294 | 111 | Vargas-Meza 2019  | Mexico                | English | 1408 | N | N | TLS      | randomized controlled trial                                | upper-middle | >18       | adults or most adults         | 0.57      | mixed         | ns    | low  | mixed | ns    | Cereal and cereal products, snack foods, non-alcoholic beverage      | multiple                                                                                | N        | package | Y       | Y | N | Y | N | N | Y | N | N | Y | Y | N | Y (detailed MTL) |                  |                  |   |
| 298 | 112 | Julia 2016        | France                | English | 901  | N | N | no label | nonequivalent control group design: posttest design        | high         | >18       | adults or most adults         | 0.71      | mostly female | ns    | ns   | ns    | mixed | snacks and cereals                                                   | multiple                                                                                | N        | package | N       | N | N | N | N | N | N | N | N | Y | N | N | N                | Y                |                  |   |
| 299 | 113 | Roberto 2016      | US                    | English | 1984 | N | N | no label | randomized controlled trial                                | high         | 36.2      | adults or most adults         | 0.7       | mostly female | white | high | mixed | ns    | Non-alcoholic beverages                                              | single                                                                                  | N        | package | Y       | N | Y | N | Y | Y | N | N | Y | N | N | N | N                | N                |                  |   |
| 300 | 114 | Andreeva 2020     | Bulgaria              | English | 808  | N | N | NFt      | randomized controlled trial                                | upper-middle | 39.2      | adults or most adults         | 0.499     | mixed         | ns    | high | mixed | ns    | Bread & bakery products, Cereal and cereal products                  | multiple                                                                                | N        | package | Y       | Y | N | Y | N | N |   |   | Y | N | N | Y | Y                | N                | Y (detailed MTL) | Y |
| 301 | 115 | Blitstein 2020    | US                    | English | 724  | Y | Y | no label | randomized controlled trial                                | high         | 34.5      | adults or most adults         |           | mostly female | white | low  | mixed | ns    | Cereal and cereal products, snack foods                              | multiple                                                                                | N        | package | N       | N | N | N | N | N | N | N | N | N | N | Y | N                | Y (detailed MTL) | N                |   |
| 302 | 116 | Clarke 2020       | UK                    | English | 4134 | N | N | no label | randomized controlled trial                                | high         | 46.5-47.8 | adults or most adults         | 0.47-0.49 | mixed         | white | high | ns    | ns    | snack foods                                                          | single                                                                                  | N        | package | Y       | N | Y | N | Y | Y | Y | N | Y | N | N | N | N                | N                | N                |   |
| 303 | 117 | Fialon 2020       | Italy                 | English | 826  | N | N | NFt      | randomized controlled trial                                | high         | >18       | adults or most adults         | 0.501     | mixed         | ns    | high | ns    | ns    | Bread & bakery products, Cereal and cereal products                  | multiple                                                                                | N        | package | Y       | Y | N | Y | N | N | Y | N | N | Y | Y | N | Y (detailed MTL) | Y                |                  |   |
| 304 | 118 | Hamlin 2020       | New Zealand           | English | 240  | N | N | no label | choice conjoint task                                       | high         | 16-18     | children or adolescent adults | 0.58      | mixed         | ns    | low  | ns    | ns    | Cereal and cereal products                                           | single                                                                                  | N        | package | Y       | Y | N | Y | N | N |   |   | N | N | N | N | N                | N                | N                |   |
| 306 | 119 | Panzone 2020      | UK                    | English | 756  | N | N | no label | randomized controlled trial                                | high         | 48.4      | adults or most adults         | 0.53      | mixed         | ns    | ns   | ns    | ns    | Fruit and vegetables, dairy                                          | multiple                                                                                | N        | package | N       | N | N | N | N | N | N | N | N | Y | Y | N | Y                | N                | Y                | N |
| 307 | 120 | Santos 2020       | Portugal              | English | 357  | N | N | no label | randomized controlled trial                                | high         | 40.6      | adults or most adults         | 0.54      | mixed         | ns    | ns   | ns    | ns    | Cereal and cereal products, Dairy, Fish and fish product             | multiple                                                                                | N        | package | N       | N | N | N | N | N | N | N | N | N | Y | Y | N                | Y (detailed MTL) | Y                |   |
| 308 | 121 | Alcantara 2020    | Brazil                | English | 821  | N | N | no label | randomized controlled trial                                | upper-middle |           | adults or most adults         |           | 0.52          | mixed | ns   | low   | low   | ns                                                                   | snack foods, Cereal and cereal products, Dairy, Fish and fish product, convenient foods | multiple | N       | package | Y | Y | N | Y | N | N | Y | N | N | N | N | N                | N                | N                | N |
| 309 | 122 | Egnell 2020b      | 12 European countries | English | 7434 | N | N | no label | randomized controlled trial Interrupted Time-Series Design | high         | >18       | adults or most adults         | 0.5       | mixed         | ns    | low  | mixed | ns    | Cereal and cereal products, bread & bakery product, convenient foods | multiple                                                                                | N        | package | Y       | Y | N | Y | N | Y | Y | N | N | Y | Y | N |                  | Y (detailed MTL) | Y                |   |
| 311 | 123 | Sarda 2020        | France                | English | 2006 | Y | N | no label | Time-Series Design                                         | high         |           | adults or most adults         | 0.52      | mixed         | ns    | high | mixed | mixed |                                                                      | multiple                                                                                | N        | package | N       | N | N | N | N | N | N | N | N | Y | N | N | N                | Y                |                  |   |



|     |     |                      |        |         |      |   |   |          |                             |      |                            |            |       |     |       |    |                                                                                                                                                        |          |   |         |   |   |   |   |   |   |   |   |   |   |   |   |                  |   |
|-----|-----|----------------------|--------|---------|------|---|---|----------|-----------------------------|------|----------------------------|------------|-------|-----|-------|----|--------------------------------------------------------------------------------------------------------------------------------------------------------|----------|---|---------|---|---|---|---|---|---|---|---|---|---|---|---|------------------|---|
| 325 | 136 | Mediano Stoltze 2021 | Chile  | English | 497  | N | N | no label | randomized controlled trial | high | 35.9 adults or most adults | 0.5 mixed  | ns    | low | ns    | ns | Cereal and cereal product Convenient food, non-alcoholic drink, cereal and cereal product, snack food, cereal and cereal product, dairy, vegetable and | single   | N | package | Y | Y | N | Y | N | N | Y | N | N | Y | N | N | N                | N |
| 326 | 137 | Packer 2021          | UK     | English | 3618 | N | N | no label | randomized controlled trial | high | >18 years                  | 0.57 mixed | white | low | ns    | ns | nt food, cereal and cereal product, snack food, cereal and cereal product, dairy, vegetable and                                                        | multiple | N | package | Y | Y | N | Y | N | N | Y | N | N | Y | Y | N | Y (detailed MTL) | Y |
| 327 | 138 | Vanderlee 2021       | Canada | English | 1498 | Y | N | no label | randomized controlled trial | high | >18 years                  | 0.5 mixed  | white | low | mixed | ns | e and                                                                                                                                                  | multiple | N | package | Y | Y | N | Y | N | N | N | N | N | Y | Y | N | Y (simple MTL)   | N |

## Supplementary References

1. Burton S, Biswas A. Preliminary Assessment of Changes in Labels Required by the Nutrition Labeling and Education Act of 1990. *J Consum Aff.* 1993;27(1):127-44. doi: 10.1111/j.1745-6606.1993.tb00741.x.
2. Bushman BJ. Effects of warning and information labels on consumption of full-fat, reduced-fat, and no-fat products. *J Appl Psychol.* 1998;83(1):97-101. Epub 1998/03/12. PubMed PMID: 9494441.
3. Jones G, Richardson M. An objective examination of consumer perception of nutrition information based on healthiness ratings and eye movements. *Public Health Nutr.* 2007;10(3):238-44. Epub 2007/02/10. doi: 10.1017/s1368980007258513. PubMed PMID: 17288620.
4. Borgmeier I, Westenhofer J. Impact of different food label formats on healthiness evaluation and food choice of consumers: a randomized-controlled study. *BMC Public Health.* 2009;9:184. Epub 2009/06/16. doi: 10.1186/1471-2458-9-184. PubMed PMID: 19523212.
5. Drichoutis AC, Lazaridis P, Nayga Jr RM. Would consumers value food-away-from-home products with nutritional labels? *Agribusiness.* 2009;25(4):550-75. doi: 10.1002/agr.20224.
6. Gorton D, Ni Mhurchu C, Chen MH, Dixon R. Nutrition labels: a survey of use, understanding and preferences among ethnically diverse shoppers in New Zealand. *Public Health Nutr.* 2009;12(9):1359-65. Epub 2008/12/18. doi: 10.1017/s1368980008004059. PubMed PMID: 19087382.
7. Sacks G, Rayner M, Swinburn B. Impact of front-of-pack 'traffic-light' nutrition labelling on consumer food purchases in the UK. *Health Promot Int.* 2009;24(4):344-52. Epub 2009/10/10. doi: 10.1093/heapro/dap032. PubMed PMID: 19815614.
8. Fatimah S, Jr., Nik Ismail ND, Tee ES. Consumer understanding and preferences for different nutrition information panel formats. *Malays J Nutr.* 2010;16(2):243-50. Epub 2010/08/01. PubMed PMID: 22691929.
9. Sacks G, Tikellis K, Millar L, Swinburn B. Impact of 'traffic-light' nutrition information on online food purchases in Australia. *Aust N Z J Public Health.* 2011;35(2):122-6. Epub 2011/04/06. doi: 10.1111/j.1753-6405.2011.00684.x. PubMed PMID: 21463406.
10. Temple JL, Johnson KM, Archer K, Lacarte A, Yi C, Epstein LH. Influence of simplified nutrition labeling and taxation on laboratory energy intake in adults. *Appetite.* 2011;57(1):184-92. Epub 2011/05/17. doi: 10.1016/j.appet.2011.04.018. PubMed PMID: 21569807.
11. van Herpen E, Trijp HCMV. Front-of-pack nutrition labels. Their effect on attention and choices when consumers have varying goals and time constraints. *Appetite.* 2011;57(1):148-60. doi: 10.1016/j.appet.2011.04.011.
12. Ares G, Gimenez A, Bruzzone F, Antunez L, Sapolinski A, Vidal L, et al. Attentional capture and understanding of nutrition labelling: a study based on response times. *Int J Food Sci Nutr.* 2012;63(6):679-88. Epub 2012/01/26. doi: 10.3109/09637486.2011.652598. PubMed PMID: 22273500.
13. Koenigstorfer J, Groeppel-Klein A, Kamm F, Rohr M, Wentura D. The traffic light colors red and green in the context of healthy food decision-making. *Adv Consum Res.* 2012;40:945-6.
14. McLean R, Hoek J, Hedderley D. Effects of alternative label formats on choice of high- and low-sodium products in a New Zealand population sample. *Public Health Nutr.* 2012;15(5):783-91. Epub 2012/01/28. doi: 10.1017/s1368980011003508. PubMed PMID: 22281127.
15. Roberto CA, Bragg MA, Schwartz MB, Seamans MJ, Musicus A, Novak N, et al. Facts up front versus traffic light food labels: a randomized controlled trial. *Am J Prev Med.* 2012;43(2):134-41. Epub 2012/07/21. doi: 10.1016/j.amepre.2012.04.022. PubMed PMID: 22813677.
16. Antúnez L, Vidal L, Sapolinski A, Giménez A, Maiche A, Ares G. How do design features influence consumer attention when looking for nutritional information on food labels? Results from an eye-tracking study on pan bread labels. *Int J Food Sci Nutr.* 2013;64(5):515-27. doi: 10.3109/09637486.2012.759187.
17. Goodman S, Hammond D, Hanning R, Sheeshka J. The impact of adding front-of-package sodium content labels to grocery products: an experimental study. *Public Health Nutr.* 2013;16(3):383-91. Epub 2012/08/04. doi: 10.1017/s1368980012003485. PubMed PMID: 22857386.
18. Mejean C, Macouillard P, Péneau S, Hercberg S, Castetbon K. Consumer acceptability and understanding of front-of-pack nutrition labels. *J Hum Nutr Diet.* 2013;26(5):494-503. doi: 10.1111/jhn.12039.
19. Savoie N, Barlow K, Harvey KL, Binnie MA, Pasut L. Consumer perceptions of front-of-package labelling systems and healthiness of foods. *Can J Public Health.* 2013;104(5):e359-e63.
20. Sonnenberg L, Gelsomin E, Levy DE, Riis J, Barraclough S, Thorndike AN. A traffic light food labeling intervention increases consumer awareness of health and healthy choices at the point-of-purchase. *Prev Med.* 2013;57(4):253-7. Epub 2013/07/19. doi: 10.1016/j.ypmed.2013.07.001. PubMed PMID: 23859926.
21. Ares G, Mawad F, Giménez A, Maiche A. Influence of rational and intuitive thinking styles on food choice: Preliminary evidence from an eye-tracking study with yogurt labels. *Food Qual Prefer.* 2014;31(1):28-37. doi: 10.1016/j.foodqual.2013.07.005.
22. Emrich TE, Qi Y, Mendoza JE, Lou W, Cohen JE, L'Abbé MR. Consumer perceptions of the Nutrition Facts table and front-of-pack nutrition rating systems. *Physiologie appliquee, nutrition et metabolisme Appl Physiol Nutr Metab.* 2014;39(4):417-24. doi: 10.1139/apnm-2013-0304. PubMed PMID: CN-01157755.
23. Koenigstorfer J, Wąsowicz-Kiryło G, Styśko-Kunkowska M, Groeppel-Klein A. Behavioural effects of directive cues on front-of-package nutrition information: The combination matters! *Public Health Nutr.* 2014;17(9):2115-21. doi: 10.1017/S136898001300219X.
24. Maubach N, Hoek J, Mather D. Interpretive front-of-pack nutrition labels. Comparing competing recommendations. *Appetite.* 2014;82:67-77. Epub 2014/07/20. doi: 10.1016/j.appet.2014.07.006. PubMed PMID: 25038407.
25. Van Herpen E, Hieke S, Van Trijp HCM. Inferring product healthfulness from nutrition labelling. The influence of reference points. *Appetite.* 2014;72:138-49. doi: 10.1016/j.appet.2013.10.012.
26. Watson WL, Kelly B, Hector D, Hughes C, King L, Crawford J, et al. Can front-of-pack labelling schemes guide healthier food choices? Australian shoppers' responses to seven labelling formats. *Appetite.* 2014;72:90-7. Epub 2013/10/16. doi: 10.1016/j.appet.2013.09.027. PubMed PMID: 24126243.
27. Ducrot P, Méjean C, Julia C, Kesse-Guyot E, Touvier M, Fezeu LK, et al. Objective understanding of front-of-package nutrition labels among nutritionally at-risk individuals. *Nutrients.* 2015;7(8):7106-25. doi: 10.3390/nu7085325.
28. Hamlin RP, McNeill LS, Moore V. The impact of front-of-pack nutrition labels on consumer product evaluation and choice: an experimental study. *Public Health Nutr.* 2015;18(12):2126-34. Epub 2014/12/23. doi: 10.1017/s1368980014002997. PubMed PMID: 25529170.
29. Mawad F, Trías M, Giménez A, Maiche A, Ares G. Influence of cognitive style on information processing and selection of yogurt labels: Insights from an eye-tracking study. *Food Res Int.* 2015;74:1-9. doi: 10.1016/j.foodres.2015.04.023.
30. Pauline D, Caroline M, Chantal J, Emmanuelle KG, Mathilde T, Léopold F, et al. Effectiveness of front-of-pack nutrition labels in french adults: Results from the nutrinet-santé cohort study. *PLoS One.* 2015;10(10). doi: 10.1371/journal.pone.0140898.
31. Siegrist M, Leins-Hess R, Keller C. Which front-of-pack nutrition label is the most efficient one? The results of an eye-tracker study. *Food Qual Prefer.* 2015;39:183-90. doi: 10.1016/j.foodqual.2014.07.010.
32. Acton RB, Vanderlee L, White C, Hammond D. The efficacy of calorie labelling formats on pre-packaged foods: An experimental study among adolescents and young adults in Canada. *Can J Public Health.* 2016;107(3):e296-e302. Epub 2016/10/21. doi: 10.17269/cjph.107.5513. PubMed PMID: 27763846.
33. Bollard T, Maubach N, Walker N, Ni Mhurchu C. Effects of plain packaging, warning labels, and taxes on young people's predicted sugar-sweetened beverage preferences: an experimental study. *Int J Behav Nutr Phys Act.* 2016;13(1):95. doi:

10.1186/s12966-016-0421-7. PubMed PMID: 27580589.

34. Crosetto P, Muller L, Ruffieux B. Helping consumers with a front-of-pack label: Numbers or colors?: Experimental comparison between Guideline Daily Amount and Traffic Light in a diet-building exercise. *J Econ Psychol.* 2016;55:30-50. doi: 10.1016/j.joep.2016.03.006.
35. Ducrot P, Julia C, Méjean C, Kesse-Guyot E, Touvier M, Fezeu LK, et al. Impact of different front-of-pack nutrition labels on consumer purchasing intentions: A randomized controlled trial. *Am J Prev Med.* 2016;50(5):627-36. doi: 10.1016/j.amepre.2015.10.020.
36. Talati T, Pettigrew S, Dixon H, Neal B, Ball K, Hughes C. Do health claims and front-of-pack labels lead to a positivity bias in unhealthy foods? *Nutrients.* 2016;8(12). doi: 10.3390/nu8120787.
37. VanEpps EM, Roberto CA. The Influence of Sugar-Sweetened Beverage Warnings: A Randomized Trial of Adolescents' Choices and Beliefs. *Am J Prev Med.* 2016;51(5):664-72. Epub 2016/09/13. doi: 10.1016/j.amepre.2016.07.010. PubMed PMID: 27617366.
38. Arrua A, Curutchet MR, Rey N, Barreto P, Golovchenko N, Sellanes A, et al. Impact of front-of-pack nutrition information and label design on children's choice of two snack foods: Comparison of warnings and the traffic-light system. *Appetite.* 2017;116:139-46. Epub 2017/04/22. doi: 10.1016/j.appet.2017.04.012. PubMed PMID: 28428151.
39. Arrúa A, Machín L, Curutchet MR, Martínez J, Antúnez L, Alcaire F, et al. Warnings as a directive front-of-pack nutrition labelling scheme: comparison with the Guideline Daily Amount and traffic-light systems. *Public Health Nutr.* 2017;20(13):2308-17. doi: 10.1017/S1368980017000866.
40. Boncinelli F, Gerini F, Pagnotta G, Alfnes F. Warning labels on junk food: experimental evidence. *Int J Consum Stud.* 2017;41(1):46-53. doi: 10.1111/ijcs.12312.
41. Julia C, Péneau S, Buscail C, Gonzalez R, Touvier M, Hercberg S, et al. Perception of different formats of front-of-pack nutrition labels according to sociodemographic, lifestyle and dietary factors in a French population: Cross-sectional study among the NutriNet-Santé cohort participants. *BMJ Open.* 2017;7(6). doi: 10.1136/bmjopen-2017-016108.
42. Neal B, Crino M, Dunford E, Gao A, Greenland R, Li N, et al. Effects of different types of front-of-pack labelling information on the healthiness of food purchases—a randomised controlled trial. *Nutrients.* 2017;9(12). doi: 10.3390/nu9121284. PubMed PMID: CN-01621767.
43. Ni Mhurchu C, Volkova E, Jiang Y, Eyles H, Michie J, Neal B, et al. Effects of interpretive nutrition labels on consumer food purchases: the Starlight randomized controlled trial. *Am J Clin Nutr.* 2017;105(3):695-704. Epub 2017/02/06. doi: 10.3945/ajcn.116.144956. PubMed PMID: 28148503.
44. Talati Z, Pettigrew S, Ball K, Hughes C, Kelly B, Neal B, et al. The relative ability of different front-of-pack labels to assist consumers discriminate between healthy, moderately healthy, and unhealthy foods. *Food Qual Prefer.* 2017;59:109-13. doi: 10.1016/j.foodqual.2017.02.010.
45. Yoo HJ, Machín L, Arrúa A, Antúnez L, Vidal L, Giménez A, et al. Children and adolescents' attitudes towards sugar reduction in dairy products. *Food Res Int (Ottawa, Ont).* 2017;94:108-14. doi: 10.1016/j.foodres.2017.02.005.
46. Acton RB, Hammond D. The impact of price and nutrition labelling on sugary drink purchases: Results from an experimental marketplace study. *Appetite.* 2018;121:129-37. Epub 2017/11/18. doi: 10.1016/j.appet.2017.11.089. PubMed PMID: 29146460.
47. Acton RB, Vanderlee L, Hammond D. Influence of front-of-package nutrition labels on beverage healthiness perceptions: Results from a randomized experiment. *Prev Med.* 2018;115:83-9. Epub 2018/08/27. doi: 10.1016/j.yjmed.2018.08.022. PubMed PMID: 30145345.
48. Ares G, Aschemann-Witzel J, Curutchet MR, Antunez L, Machin L, Vidal L, et al. Product reformulation in the context of nutritional warning labels: Exploration of consumer preferences towards food concepts in three food categories. *Food Res Int (Ottawa, Ont).* 2018;107:669-74. Epub 2018/03/28. doi: 10.1016/j.foodres.2018.03.021. PubMed PMID: 29580533.
49. Ares G, Aschemann-Witzel J, Curutchet MR, Antúnez L, Machín L, Vidal L, et al. Nutritional warnings and product substitution or abandonment: Policy implications derived from a repeated purchase simulation. *Food Qual Prefer.* 2018;65:40-8. doi: 10.1016/j.foodqual.2017.12.001.
50. Ares G, Varela F, Machin L, Antúnez L, Giménez A, Curutchet MR, et al. Comparative performance of three interpretative front-of-pack nutrition labelling schemes: Insights for policy making. *Food Qual Prefer.* 2018;68:215-25. doi: 10.1016/j.foodqual.2018.03.007.
51. Billich N, Blake MR, Backholer K, Cobcroft M, Li V, Peeters A. The effect of sugar-sweetened beverage front-of-pack labels on drink selection, health knowledge and awareness: An online randomised controlled trial. *Appetite.* 2018;128:233-41. Epub 2018/06/08. doi: 10.1016/j.appet.2018.05.149. PubMed PMID: 29879450.
52. David IA, Krutman L, Fernandez-Santaella MC, Andrade JR, Andrade EB, Oliveira L, et al. Appetitive drives for ultra-processed food products and the ability of text warnings to counteract consumption predispositions. *Public Health Nutr.* 2018;21(3):543-57. Epub 2017/11/28. doi: 10.1017/s1368980017003263. PubMed PMID: 29173214.
53. Donnelly GE, Zatz LY, Svirsky D, John LK. The Effect of Graphic Warnings on Sugary-Drink Purchasing. *Psychol Sci.* 2018;29(8):1321-33. Epub 2018/06/19. doi: 10.1177/0956797618766361. PubMed PMID: 29912624.
54. Egnell M, Ducrot P, Touvier M, Allès B, Hercberg S, Kesse-Guyot E, et al. Objective understanding of Nutri-Score Front-Of-Package nutrition label according to individual characteristics of subjects: Comparisons with other format labels. *PLoS One.* 2018;13(8). doi: 10.1371/journal.pone.0202095.
55. Egnell M, Kesse-Guyot E, Galan P, Touvier M, Rayner M, Jewell J, et al. Impact of front-of-pack nutrition labels on portion size selection: An experimental study in a French cohort. *Nutrients.* 2018;10(9). doi: 10.3390/nu10091268.
56. Goodman S, Vanderlee L, Acton R, Mahamad S, Hammond D. The Impact of Front-of-Package Label Design on Consumer Understanding of Nutrient Amounts. *Nutrients.* 2018;10(11). Epub 2018/11/08. doi: 10.3390/nu10111624. PubMed PMID: 30400146.
57. Gorski Findling MT, Werth PM, Musicus AA, Bragg MA, Graham DJ, Elbel B, et al. Comparing five front-of-pack nutrition labels' influence on consumers' perceptions and purchase intentions. *Prev Med.* 2018;106:114-21. Epub 2017/10/27. doi: 10.1016/j.yjmed.2017.10.022. PubMed PMID: 29066375.
58. Khandpur N, de Morais Sato P, Mais LA, Bortoletto Martins AP, Spinillo CG, Garcia MT, et al. Are Front-of-Package Warning Labels More Effective at Communicating Nutrition Information than Traffic-Light Labels? A Randomized Controlled Experiment in a Brazilian Sample. *Nutrients.* 2018;10(6). Epub 2018/05/31. doi: 10.3390/nu10060688. PubMed PMID: 29843449.
59. Lima M, Ares G, Deliza R. How do front of pack nutrition labels affect healthfulness perception of foods targeted at children? Insights from Brazilian children and parents. *Food Qual Prefer.* 2018;64:111-9. doi: 10.1016/j.foodqual.2017.10.003.
60. Machin L, Arrua A, Gimenez A, Curutchet MR, Martinez J, Ares G. Can nutritional information modify purchase of ultra-processed products? Results from a simulated online shopping experiment. *Public Health Nutr.* 2018;21(1):49-57. Epub 2017/07/19. doi: 10.1017/s1368980017001185. PubMed PMID: 28716163.
61. Machin L, Aschemann-Witzel J, Curutchet MR, Gimenez A, Ares G. Traffic Light System Can Increase Healthfulness Perception: Implications for Policy Making. *J Nutr Educ Behav.* 2018;50(7):668-74. Epub 2018/04/09. doi: 10.1016/j.jneb.2018.03.005.

PubMed PMID: 29627330.

62. Machín L, Aschemann-Witzel J, Curutchet MR, Giménez A, Ares G. Does front-of-pack nutrition information improve consumer ability to make healthful choices? Performance of warnings and the traffic light system in a simulated shopping experiment. *Appetite*. 2018;121:55-62. doi: 10.1016/j.appet.2017.10.037.
63. Mantzari E, Vasiljevic M, Turney I, Pilling M, Marteau T. Impact of warning labels on sugar-sweetened beverages on parental selection: An online experimental study. *Prev Med Rep*. 2018;12:259-67. doi: 10.1016/j.pmedr.2018.10.016.
64. Mazza MC, Dynan L, Siegel RM, Tucker AL. Nudging Healthier Choices in a Hospital Cafeteria: Results From a Field Study. *Health Promot Pract*. 2018;19(6):925-34. doi: 10.1177/1524839917740119.
65. Moran AJ, Roberto CA. Health Warning Labels Correct Parents' Misperceptions About Sugary Drink Options. *Am J Prev Med*. 2018;55(2):e19-e27. Epub 2018/06/16. doi: 10.1016/j.amepre.2018.04.018. PubMed PMID: 29903567.
66. Talati Z, Norman R, Kelly B, Dixon H, Neal B, Miller C, et al. A randomized trial assessing the effects of health claims on choice of foods in the presence of front-of-pack labels. *Am J Clin Nutr*. 2018;108(6):1275-82. doi: 10.1093/ajcn/nqy248.
67. Talati Z, Pettigrew S, Kelly B, Ball K, Neal B, Dixon H, et al. Can front-of-pack labels influence portion size judgements for unhealthy foods? *Public Health Nutr*. 2018;21(15):2776-81. Epub 2018/07/19. doi: 10.1017/s1368980018001702. PubMed PMID: 30017011.
68. Acton RB, Jones AC, Kirkpatrick SI, Roberto CA, Hammond D. Taxes and front-of-package labels improve the healthiness of beverage and snack purchases: a randomized experimental marketplace. *Int J Behav Nutr Phys Act*. 2019;16(1):46. Epub 2019/05/23. doi: 10.1186/s12966-019-0799-0. PubMed PMID: 31113448.
69. Alonso-Dos-Santos M, Ulloa RQ, Quintana AS, Quijada DV, Nazel PF. Nutrition labeling schemes and the time and effort of consumer processing. *Sustainability (Switzerland)*. 2019;11(4). doi: 10.3390/su11041079.
70. Ang FJL, Agrawal S, Finkelstein EA. Pilot randomized controlled trial testing the influence of front-of-pack sugar warning labels on food demand. *BMC Public Health*. 2019;19(1):164. Epub 2019/02/09. doi: 10.1186/s12889-019-6496-8. PubMed PMID: 30732609.
71. Egnell M, Crosetto P, D'Almeida T, Kesse-Guyot E, Touvier M, Ruffieux B, et al. Modelling the impact of different front-of-package nutrition labels on mortality from non-communicable chronic disease. *Int J Behav Nutr Phys Act*. 2019;16(1). doi: 10.1186/s12966-019-0817-2.
72. Galan P, Egnell M, Salas-Salvadó J, Babio N, Pettigrew S, Hercberg S, et al. Understanding of different front-of-package labels by the Spanish population: Results of a comparative study. *Endocrinol Diabetes Nutr*. 2019. doi: 10.1016/j.endinu.2019.03.013.
73. Grummon AH, Hall MG, Taillie LS, Brewer NT. How should sugar-sweetened beverage health warnings be designed? A randomized experiment. *Prev Med*. 2019;121:158-66. Epub 2019/02/18. doi: 10.1016/j.ypmed.2019.02.010. PubMed PMID: 30772370.
74. Hayward LE, Vartanian LR. Potential unintended consequences of graphic warning labels on sugary drinks: do they promote obesity stigma? *Obes Sci Pract*. 2019. doi: 10.1002/osp4.353.
75. Karamanos V, Hobbs JE, Slade P. Consumer responses to private nutrition signals. *J Food Prod Mark*. 2019;25(2):111-36. doi: 10.1080/10454446.2018.1498044.
76. Lima M, de Alcantara M, Ares G, Deliza R. It is not all about information! Sensory experience overrides the impact of nutrition information on consumers' choice of sugar-reduced drinks. *Food Qual Prefer*. 2019;74:1-9. doi: 10.1016/j.foodqual.2018.12.013.
77. Machín L, Curutchet MR, Giménez A, Aschemann-Witzel J, Ares G. Do nutritional warnings do their work? Results from a choice experiment involving snack products. *Food Qual Prefer*. 2019;77:159-65. doi: 10.1016/j.foodqual.2019.05.012.
78. Marette S, Nabec L, Durieux F. Improving Nutritional Quality of Consumers' Food Purchases With Traffic-Lights Labels: An Experimental Analysis. *J Consum Policy (Dordr)*. 2019. doi: 10.1007/s10603-019-09420-5.
79. Popova L, Nonnemaker J, Taylor N, Bradfield B, Kim A. Warning Labels on Sugar-sweetened Beverages: An Eye Tracking Approach. *Am J Health Behav*. 2019;43(2):406-19. Epub 2019/02/28. doi: 10.5993/ajhb.43.2.16. PubMed PMID: 30808479.
80. Rosenblatt DH, Dixon H, Wakefield M, Bode S. Evaluating the influence of message framing and graphic imagery on perceptions of food product health warnings. *Food Qual Prefer*. 2019;77:32-42. doi: 10.1016/j.foodqual.2019.05.003.
81. Schnettler B, Ares G, Sepúlveda N, Bravo S, Villalobos B, Hueche C, et al. How do consumers perceive reformulated foods after the implementation of nutritional warnings? Case study with frankfurters in Chile. *Food Qual Prefer*. 2019;74:179-88. doi: 10.1016/j.foodqual.2019.01.021.
82. Schnettler B, Ares G, Sepúlveda N, Bravo S, Villalobos B, Hueche C, et al. Are consumers willing to pay more for reformulated processed meat products in the context of the implementation of nutritional warnings? Case study with frankfurters in Chile. *Meat Sci*. 2019;152:104-8. doi: 10.1016/j.meatsci.2019.02.007.
83. Velasco Vizcaíno F, Velasco A. The battle between brands and nutritional labels: How brand familiarity decreases consumers' alertness toward traffic light nutritional labels. *J Bus Res*. 2019;101:637-50. doi: 10.1016/j.jbusres.2019.02.054.
84. Nobrega L, Ares G, Deliza R. Are nutritional warnings more efficient than claims in shaping consumers' healthfulness perception? *Food Qual Prefer*. 2020;79. doi: 10.1016/j.foodqual.2019.103749.
85. Bix L, Sundar RP, Bello NM, Peltier C, Weatherspoon LJ, Becker MW. To See or Not to See: Do Front of Pack Nutrition Labels Affect Attention to Overall Nutrition Information? *PLoS One*. 2015;10(10):e0139732. Epub 2015/10/22. doi: 10.1371/journal.pone.0139732. PubMed PMID: 26488611.
86. Hobin E, Sacco J, Vanderlee L, White CM, Zuo F, Sheeshka J, et al. A randomized trial testing the efficacy of modifications to the nutrition facts table on comprehension and use of nutrition information by adolescents and young adults in Canada. *Health Promot Chronic Dis Prev Can*. 2015;35(10):173-83. Epub 2015/12/18. PubMed PMID: 26674187.
87. Egnell M, Boutron I, Peneau S, Ducrot P, Touvier M, Galan P, et al. Front-of-Pack Labeling and the Nutritional Quality of Students' Food Purchases: A 3-Arm Randomized Controlled Trial. *Am J Public Health*. 2019;109(8):1122-9. Epub 2019/06/21. doi: 10.2105/ajph.2019.305115. PubMed PMID: 31219721.
88. Poquet D, Ginon E, Goubel B, Chabanet C, Marette S, Issanchou S, et al. Impact of a front-of-pack nutritional traffic-light label on the nutritional quality and the hedonic value of mid-afternoon snacks chosen by mother-child dyads. *Appetite*. 2019;143:104425. Epub 2019/08/30. doi: 10.1016/j.appet.2019.104425. PubMed PMID: 31465810.
89. Trudel R, Murray KB, Kim S, Chen S. The impact of traffic light color-coding on food health perceptions and choice. *J Exp Psychol Appl*. 2015;21(3):255-75. Epub 2015/06/30. doi: 10.1037/xap0000049. PubMed PMID: 26121372.
90. Crockett RA, Jebb SA, Hankins M, Marteau TM. The impact of nutritional labels and socioeconomic status on energy intake. An experimental field study. *Appetite*. 2014;81:12-9. Epub 2014/06/01. doi: 10.1016/j.appet.2014.05.024. PubMed PMID: 24879885.
91. Egnell M, Talati Z, Pettigrew S, Galan P, Hercberg S, Julia C. Comparison of front-of-pack labels to help German consumers understand the nutritional quality of food products: Color-coded labels outperform all other systems. *Ernahrungs Umschau*. 2019;66(5):76-84. doi: 10.4455/eu.2019.020.
92. Finkelstein EA, Ang FJL, Doble B, Wong WHM, Van Dam RM. A randomized controlled trial evaluating the relative effectiveness of the multiple traffic light and nutri-score front of package nutrition labels. *Nutrients*. 2019;11(9). doi: 10.3390/nu11092236.
93. Grummon AH, Taillie LS, Golden SD, Hall MG, Ranney LM, Brewer NT. Sugar-Sweetened Beverage Health Warnings and Purchases: A Randomized Controlled Trial. *Am J Prev Med*. 2019;57(5):601-10. Epub 2019/10/07. doi: 10.1016/j.amepre.2019.06.019. PubMed PMID: 31586510.

94. Nieto C, Jauregui A, Contreras-Manzano A, Arillo-Santillan E, Barquera S, White CM, et al. Understanding and use of food labeling systems among Whites and Latinos in the United States and among Mexicans: Results from the International Food Policy Study, 2017. *Int J Behav Nutr Phys Act.* 2019;16(1):87. Epub 2019/10/19. doi: 10.1186/s12966-019-0842-1. PubMed PMID: 31623663.
95. Talati Z, Egnell M, Hercberg S, Julia C, Pettigrew S. Food Choice Under Five Front-of-Package Nutrition Label Conditions: An Experimental Study Across 12 Countries. *Am J Public Health.* 2019:e1-e6. Epub 2019/10/18. doi: 10.2105/ajph.2019.305319. PubMed PMID: 31622139.
96. Talati Z, Egnell M, Hercberg S, Julia C, Pettigrew S. Consumers' Perceptions of Five Front-of-Package Nutrition Labels: An Experimental Study Across 12 Countries. *Nutrients.* 2019;11(8). Epub 2019/08/21. doi: 10.3390/nu11081934. PubMed PMID: 31426450.
97. Mantzari E, Pechey R, Codling S, Sexton O, Hollands GJ, Marteau TM. The impact of 'on-pack' pictorial health warning labels and calorie information labels on drink choice: A laboratory experiment. *Appetite.* 2020;145. doi: 10.1016/j.appet.2019.104484.
98. Defago D, Geng JF, Molina O, Santa María D. Can traffic light nutritional labels induce healthier consumer choices? Experimental evidence from a developing country. *Int J Consum Stud.* 2019.
99. Egnell M, Galan P, Farpour-Lambert NJ, Talati Z, Pettigrew S, Hercberg S, et al. Compared to other front-of-pack nutrition labels, the Nutri-Score emerged as the most efficient to inform Swiss consumers on the nutritional quality of food products. *PLoS One.* 2020;15(2):e0228179. Epub 2020/02/29. doi: 10.1371/journal.pone.0228179. PubMed PMID: 32107489.
100. Franco-Arellano B, Vanderlee L, Ahmed M, Oh A, L'Abbé M. Influence of front-of-pack labelling and regulated nutrition claims on consumers' perceptions of product healthfulness and purchase intentions: A randomized controlled trial. *Appetite.* 2020;149:104629. Epub 2020/02/18. doi: 10.1016/j.appet.2020.104629. PubMed PMID: 32061707.
101. Gabor AM, Stojnić B, Ostić DB. Effects of different nutrition labels on visual attention and accuracy of nutritional quality perception—Results of an experimental eye-tracking study. *Food Qual Prefer.* 2020;84:103948. doi: 10.1016/j.foodqual.2020.103948.
102. Hagmann D, Siegrist M. Nutri-Score, multiple traffic light and incomplete nutrition labelling on food packages: Effects on consumers' accuracy in identifying healthier snack options. *Food Qual Prefer.* 2020;83:103894. doi: 10.1016/j.foodqual.2020.103894.
103. Hall MG, Grummon AH, Lazard AJ, Maynard OM, Taillie LS. Reactions to graphic and text health warnings for cigarettes, sugar-sweetened beverages, and alcohol: An online randomized experiment of US adults. *Prev Med.* 2020:106120. Epub 2020/05/22. doi: 10.1016/j.ypmed.2020.106120. PubMed PMID: 32437703.
104. Hall MG, Lazard AJ, Grummon AH, Mendel JR, Taillie LS. The impact of front-of-package claims, fruit images, and health warnings on consumers' perceptions of sugar-sweetened fruit drinks: Three randomized experiments. *Prev Med.* 2020;132:105998. Epub 2020/01/27. doi: 10.1016/j.ypmed.2020.105998. PubMed PMID: 31982477.
105. Hernández-Nava LG, Egnell M, Aguilar-Salinas CA, Córdova-Villalobos J, Barriguete-Meléndez JA, Pettigrew S, et al. [Impact of different front-of-pack nutrition labels on foods according to their nutritional quality: a comparative study in Mexico]. *Salud Publica Mex.* 2019;61(5):609-18. Epub 2019/10/30. doi: 10.21149/10318. PubMed PMID: 31661738.
106. Jáuregui A, Vargas-Meza J, Nieto C, Contreras-Manzano A, Alejandro NZ, Tolentino-Mayo L, et al. Impact of front-of-pack nutrition labels on consumer purchasing intentions: a randomized experiment in low- and middle-income Mexican adults. *BMC Public Health.* 2020;20(1):463. Epub 2020/04/08. doi: 10.1186/s12889-020-08549-0. PubMed PMID: 32252716.
107. Retno D. The Impact of Front-of-Package Traffic Light (Foptl) in the Senior High School Students' Nutrition Labels Comprehension. *Curr Res Nutr Food Sci.* 2019;7(3):918. doi: 10.12944/CRNFSJ.7.3.30
108. Taillie LS, Reyes M, Colchero MA, Popkin B, Corvalán C. An evaluation of Chile's Law of Food Labeling and Advertising on sugar-sweetened beverage purchases from 2015 to 2017: A before-and-after study. *PLoS Med.* 2020;17(2):e1003015. Epub 2020/02/12. doi: 10.1371/journal.pmed.1003015. PubMed PMID: 32045424.
109. Uribe R, Manzur E, Cornejo C. Varying the Number of FOP Warnings on Hedonic and Utilitarian Food Products: Evidence from Chile. *J Food Prod Mark.* 2020;26(2):123-43. doi: 10.1080/10454446.2020.1738971.
110. Vandevijvere S, Vermote M, Egnell M, Galan P, Talati Z, Pettigrew S, et al. Consumers' food choices, understanding and perceptions in response to different front-of-pack nutrition labelling systems in Belgium: results from an online experimental study. *Arch Public Health.* 2020;78:30. Epub 2020/04/09. doi: 10.1186/s13690-020-00404-3. PubMed PMID: 32266069.
111. Vargas-Meza J, Jáuregui A, Contreras-Manzano A, Nieto C, Barquera S. Acceptability and understanding of front-of-pack nutritional labels: an experimental study in Mexican consumers. *BMC Public Health.* 2019;19(1):1751. Epub 2020/01/01. doi: 10.1186/s12889-019-8108-z. PubMed PMID: 31888575.
112. Julia C, Blanchet O, Mejean C, Peneau S, Ducrot P, Alles B, et al. Impact of the front-of-pack 5-colour nutrition label (5-CNL) on the nutritional quality of purchases: an experimental study. *Int J Behav Nutr Phys Act.* 2016;13(1):101. Epub 2016/09/21. doi: 10.1186/s12966-016-0416-4. PubMed PMID: 27645372.
113. Roberto CA, Wong D, Musicus A, Hammond D. The Influence of Sugar-Sweetened Beverage Health Warning Labels on Parents' Choices. *Pediatrics.* 2016;137(2):e20153185. Epub 2016/01/16. doi: 10.1542/peds.2015-3185. PubMed PMID: 26768346.
114. Andreeva VA, Egnell M, Handjieva-Darlenska T, Talati Z, Touvier M, Galan P, et al. Bulgarian consumers' objective understanding of front-of-package nutrition labels: a comparative, randomized study. *Arch Public Health.* 2020;78:35. Epub 2020/06/13. doi: 10.1186/s13690-020-00416-z. PubMed PMID: 32528678.
115. Blitstein JL, Guthrie JF, Rains C. Low-Income Parents' Use of Front-of-Package Nutrition Labels in a Virtual Supermarket. *J Nutr Educ Behav.* 2020. Epub 2020/06/02. doi: 10.1016/j.jneb.2020.04.003. PubMed PMID: 32475704.
116. Clarke N, Pechey E, Mantzari E, Blackwell AKM, De-Loyde K, Morris RW, et al. Impact of health warning labels on snack selection: An online experimental study. *Appetite.* 2020;154:104744. Epub 2020/06/21. doi: 10.1016/j.appet.2020.104744. PubMed PMID: 32562806.
117. Fialon M, Egnell M, Talati Z, Galan P, Dréano-Trécant L, Touvier M, et al. Effectiveness of Different Front-of-Pack Nutrition Labels among Italian Consumers: Results from an Online Randomized Controlled Trial. *Nutrients.* 2020;12(8). Epub 2020/08/06. doi: 10.3390/nu12082307. PubMed PMID: 32752021.
118. Hamlin R, Hamlin B. An Experimental Comparison of the Impact of 'Warning' and 'Health Star Rating' FoP Labels on Adolescents' Choice of Breakfast Cereals in New Zealand. *Nutrients.* 2020;12(6). Epub 2020/05/30. doi: 10.3390/nu12061545. PubMed PMID: 32466408.
119. Panzone LA, Sniehotta FF, Comber R, Lemke F. The effect of traffic-light labels and time pressure on estimating kilocalories and carbon footprint of food. *Appetite.* 2020:104794. Epub 2020/08/12. doi: 10.1016/j.appet.2020.104794. PubMed PMID: 32781081.
120. Santos O, Alarcão V, Feteira-Santos R, Fernandes J, Virgolino A, Sena C, et al. Impact of different front-of-pack nutrition labels on online food choices. *Appetite.* 2020;154:104795. Epub 2020/08/17. doi: 10.1016/j.appet.2020.104795. PubMed PMID: 32798050.
121. Alcantara MD, Ares G, de Castro IPL, Deliza R. Gain vs. loss-framing for reducing sugar consumption: Insights from a choice experiment with six product categories. *Food Res Int.* 2020;136. doi: 10.1016/j.foodres.2020.109458. PubMed PMID: 32846549.
122. Egnell M, Talati Z, Galan P, Andreeva VA, Vandevijvere S, Gombaud M, et al. Objective understanding of the Nutri-score front-of-pack label by European consumers and its effect on food choices: an online experimental study. *Int J Behav Nutr Phys*



Act. 2020;17(1). doi: 10.1186/s12966-020-01053-z. PubMed PMID: 33213459.

123. Sarda B, Julia C, Serry AJ, Ducrot P. Appropriation of the front-of-pack nutrition label nutri-score across the french population: Evolution of awareness, support, and purchasing behaviors between 2018 and 2019. *Nutrients*. 2020;12(9):1-12. doi: 10.3390/nu12092887. PubMed PMID: 32971744.
124. Taillie LS, Hall MG, Gómez LF, Higgins I, Bercholz M, Murukutla N, et al. Designing an effective front-of-package warning label for food and drinks high in added sugar, sodium, or saturated fat in colombia: An online experiment. *Nutrients*. 2020;12(10):1-20. doi: 10.3390/nu12103124. PubMed PMID: 33066130.
125. Aguenau H, El Ammari L, Bigdeli M, El Hajjab A, Lahmam H, Labzizi S, et al. Comparison of appropriateness of Nutri-Score and other front-of-pack nutrition labels across a group of Moroccan consumers: awareness, understanding and food choices. *Arch Public Health*. 2021;79(1):71. Epub 2021/05/08. doi: 10.1186/s13690-021-00595-3. PubMed PMID: 33957970.
126. Andrews JC, Netemeyer R, Burton S, Kees J. What consumers actually know: The role of objective nutrition knowledge in processing stop sign and traffic light front-of-pack nutrition labels. *J Bus Res*. 2021;128:140-55. doi: 10.1016/j.jbusres.2021.01.036.
127. Ares G, Antúnez L, Curutchet MR, Galicia L, Moratorio X, Giménez A, et al. Immediate effects of the implementation of nutritional warnings in Uruguay: Awareness, self-reported use and increased understanding. *Public Health Nutr*. 2021;24(2):364-75. doi: 10.1017/S1368980020002517. PubMed PMID: 32782052
128. Asbridge SCM, Pechey E, Marteau TM, Hollands GJ. Effects of pairing health warning labels with energy-dense snack foods on food choice and attitudes: Online experimental study. *Appetite*. 2021;160. doi: 10.1016/j.appet.2020.105090. PubMed PMID: 33373631.
129. Bandeira LM, Pedroso J, Toral N, Gubert MB. Performance and perception on front-of-package nutritional labeling models in Brazil. *Rev Saude Publica*. 2021;55:19. doi: 10.11606/s1518-8787.2021055002395. PubMed PMID: 33978115.
130. De Temmerman J, Heeremans E, Slabbinck H, Vermeir I. The impact of the Nutri-Score nutrition label on perceived healthiness and purchase intentions. *Appetite*. 2021;157. doi: 10.1016/j.appet.2020.104995. PubMed PMID: 33068665.
131. Devia G, Forli S, Vidal L, Curutchet MR, Ares G. References to home-made and natural foods on the labels of ultra-processed products increase healthfulness perception and purchase intention: Insights for policy making. *Food Qual Prefer*. 2021;88. doi: 10.1016/j.foodqual.2020.104110.
132. Egnell M, Boutron I, Péneau S, Ducrot P, Touvier M, Galan P, et al. Randomised controlled trial in an experimental online supermarket testing the effects of front-of-pack nutrition labelling on food purchasing intentions in a low-income population. *BMJ open*. 2021;11(2). doi: 10.1136/bmjopen-2020-041196. PubMed PMID: 33558350.
133. Egnell M, Galan P, Fialon M, Touvier M, Péneau S, Kesse-Guyot E, et al. The impact of the Nutri-Score front-of-pack nutrition label on purchasing intentions of unprocessed and processed foods: post-hoc analyses from three randomized controlled trials. *Int J Behav Nutr Phys Act*. 2021;18(1). doi: 10.1186/s12966-021-01108-9. PubMed PMID: 33731145.
134. Hall MG, Lazard AJ, Grummon AH, Higgins ICA, Bercholz M, Richter APC, et al. Designing warnings for sugary drinks: A randomized experiment with Latino parents and non-Latino parents. *Prev Med*. 2021;148:106562. Epub 2021/04/21. doi: 10.1016/j.ypmed.2021.106562. PubMed PMID: 33878350.
135. Mauri C, Grazzini L, Ulqinaku A, Poletti E. The effect of front-of-package nutrition labels on the choice of low sugar products. *Psychol Mark*. 2021. doi: 10.1002/mar.21473.
136. Mediano Stoltze F, Busey E, Taillie LPS, Dillman Carpentier FR. Impact of warning labels on reducing health halo effects of nutrient content claims on breakfast cereal packages: A mixed-measures experiment. *Appetite*. 2021;163. doi: 10.1016/j.appet.2021.105229. PubMed PMID: 33789168.
137. Packer J, Russell SJ, Ridout D, Hope S, Conolly A, Jessop C, et al. Assessing the effectiveness of front of pack labels: Findings from an online randomised-controlled experiment in a representative British sample. *Nutrients*. 2021;13(3):1-15. doi: 10.3390/nu13030900. PubMed PMID: 33802115.
138. Vanderlee L, Franco-Arellano B, Ahmed M, Oh A, Lou W, L'Abbé MR. The efficacy of 'high in' warning labels, health star and traffic light front-of-package labelling: An online randomised control trial. *Public Health Nutr*. 2021;24(1):62-74. doi: 10.1017/S1368980020003213. PubMed PMID: 33019950.
