# Supplementary material for: Impact of color-coded and warning nutrition labelling schemes: A systematic review and network meta-analysis
Source: PLoS Med. 2021 Oct 5;18(10):e1003765. doi: 10.1371/journal.pmed.1003765 (PMC8491916; doi:10.1371/journal.pmed.1003765)
Supplement: S8 Table — (XLSX) [file pmed.1003765.s016.xlsx]

## Sheet: S8_Table
S8 Table. The netsplitting of sensitivity network meta-analysis in studies estimates (including only randomised controlled trials) for changes in consumers dietary behaviours into the contribution of direct and indirect evidence and test for local inconsistency.
Outcome measures	Number of studies	Comparison	Number of comparisons	Direct estimate	Indirect estimate	Network estimate	P-value of inconsistency test	Proportion of direct evidence (%)	Full design-by-treatment model: Q statistic	Full design-by-treatment model: p-value associated with Q statistic
Probability of selecting less healthful/more healthful options (OR and 95%Ci)
less healthful options	29	HW vs. control	13	0.63 (0.49, 0.8)	0.55 (0.16, 1.89)	0.62 (0.49, 0.79)	0.849005	0.962228	30.11	0.0008
		HW vs. NS	0	.	0.81 (0.54, 1.23)	0.81 (0.54, 1.23)	.	0
		HW vs. NW	2	1.08 (0.6, 1.97)	0.85 (0.56, 1.3)	0.92 (0.65, 1.3)	0.511083	0.333451
		HW vs. TLS	0	.	0.82 (0.57, 1.17)	0.82 (0.57, 1.17)	.	0
		NS vs. control	2	1.15 (0.64, 2.06)	0.61 (0.39, 0.95)	0.77 (0.54, 1.09)	0.0904824	0.358435
		NS vs. NW	6	1 (0.7, 1.43)	1.85 (0.9, 3.81)	1.13 (0.82, 1.56)	0.133628	0.802751
		NS vs. TLS	6	1.03 (0.72, 1.48)	0.89 (0.43, 1.85)	1 (0.73, 1.38)	0.723209	0.805469
		NW vs. control	6	0.66 (0.46, 0.94)	0.71 (0.45, 1.11)	0.68 (0.51, 0.9)	0.805914	0.613934
		NW vs. TLS	8	0.94 (0.69, 1.29)	0.72 (0.4, 1.29)	0.89 (0.68, 1.17)	0.421308	0.781749
		TLS vs. control	7	0.84 (0.59, 1.19)	0.63 (0.38, 1.02)	0.76 (0.57, 1.01)	0.329258	0.662296
more healthful options	29	HW vs. control	13	1.67 (1.33, 2.11)	1.26 (0.26, 6.12)	1.66 (1.32, 2.09)	0.726273	0.979052	24.7	0.0059
		HW vs. NS	0	.	0.93 (0.63, 1.38)	0.93 (0.63, 1.38)	.	0
		HW vs. NW	1	0.82 (0.35, 1.93)	1.22 (0.83, 1.8)	1.14 (0.8, 1.62)	0.4074	0.17279
		HW vs. TLS	0	.	0.96 (0.67, 1.36)	0.96 (0.67, 1.36)	.	0
		NS vs. control	2	1 (0.58, 1.72)	2.52 (1.66, 3.83)	1.79 (1.28, 2.49)	0.00801006	0.372941
		NS vs. NW	6	1.51 (1.09, 2.09)	0.46 (0.23, 0.94)	1.23 (0.91, 1.65)	0.00296213	0.82385
		NS vs. TLS	6	1.09 (0.79, 1.51)	0.78 (0.39, 1.55)	1.03 (0.77, 1.38)	0.384305	0.817747
		NW vs. control	5	1.5 (1.03, 2.18)	1.41 (0.91, 2.18)	1.46 (1.1, 1.94)	0.835016	0.578294
		NW vs. TLS	8	0.81 (0.61, 1.07)	1 (0.54, 1.84)	0.84 (0.65, 1.09)	0.529391	0.8211
		TLS vs. control	7	1.69 (1.22, 2.34)	1.85 (1.13, 3.01)	1.74 (1.32, 2.28)	0.76913	0.69349
Purchase intention for less healthful/more healthful products (RMD and SE)
Purchase intention for less healthful products	14	HW vs. control	4	-0.097 (-0.257, 0.063)	-0.441 (-1.095, 0.213)	-0.116 (-0.272, 0.039)	0.317375	0.996158	1.28	0.8651
		HW vs. NS	0	.	-0.11 (-0.536, 0.315)	-0.11 (-0.536, 0.315)	.	0
		HW vs. NW	1	0.01 (-0.321, 0.341)	0.228 (-0.001, 0.456)	0.157 (-0.03, 0.345)	0.288193	0.050398
		HW vs. TLS	0	.	-0.021 (-0.221, 0.179)	-0.021 (-0.221, 0.179)	.	0
		NS vs. control	1	-0.006 (-0.402, 0.39)	.	-0.006 (-0.402, 0.39)	.	1
		NS vs. NW	0	.	0.268 (-0.147, 0.683)	0.268 (-0.147, 0.683)	.	0
		NS vs. TLS	0	.	0.09 (-0.327, 0.506)	0.09 (-0.327, 0.506)	.	0
		NW vs. control	6	-0.289 (-0.42, -0.158)	-0.125 (-0.538, 0.289)	-0.274 (-0.399, -0.149)	0.457585	0.998819
		NW vs. TLS	2	-0.165 (-0.388, 0.059)	-0.193 (-0.423, 0.037)	-0.178 (-0.339, -0.018)	0.864504	0.982515
		TLS vs. control	6	-0.097 (-0.231, 0.037)	-0.075 (-0.575, 0.424)	-0.096 (-0.225, 0.034)	0.934209	0.983899
Purchase intention for more healthful products	5	HW vs. control	3	0.255 (-0.048, 0.558)	.	0.255 (-0.048, 0.558)	.	1	0	.
		HW vs. NS	0	.	0.13 (-0.493, 0.753)	0.13 (-0.493, 0.753)	.	0
		HW vs. NW	0	.	0.313 (-0.284, 0.911)	0.313 (-0.284, 0.911)	.	0
		HW vs. TLS	0	.	0.191 (-0.407, 0.789)	0.191 (-0.407, 0.789)	.	0
		NS vs. control	1	0.125 (-0.419, 0.669)	.	0.125 (-0.419, 0.669)	.	1
		NS vs. NW	0	.	0.183 (-0.566, 0.932)	0.183 (-0.566, 0.932)	.	0
		NS vs. TLS	0	.	0.061 (-0.689, 0.81)	0.061 (-0.689, 0.81)	.	0
		NW vs. control	1	-0.061 (-0.576, 0.454)	.	-0.058 (-0.573, 0.456)	.	1
		NW vs. TLS	1	-0.12 (-0.634, 0.394)	.	-0.123 (-0.637, 0.392)	.	1
		TLS vs. control	1	0.067 (-0.449, 0.583)	.	0.064 (-0.451, 0.58)	.	1
Change in overall healthfulness of purchased products (RMD and SE)
overall healthfulness	9	NS vs. control	4	0.087 (0.009, 0.165)	0.222 (-0.007, 0.451)	0.101 (0.027, 0.174)	0.272593	0.857115	241.61	< 0.0001
		NS vs. NW	0	.	-0.114 (-0.217, -0.01)	-0.114 (-0.217, -0.01)	.	0
		NS vs. TLS	2	0.015 (-0.074, 0.104)	0.006 (-0.157, 0.17)	0.013 (-0.065, 0.091)	0.925526	0.848006
		NW vs. control	2	0.261 (0.168, 0.353)	0.061 (-0.108, 0.23)	0.214 (0.133, 0.296)	0.0417704	0.845963
		NW vs. TLS	2	0.001 (-0.101, 0.103)	0.385 (0.239, 0.532)	0.127 (0.043, 0.211)	2.52351e-05	0.969939
		TLS vs. control	5	0.037 (-0.026, 0.101)	0.533 (0.345, 0.721)	0.088 (0.028, 0.148)	9.69693e-07	0.995054
Change in energy content of purchased products (RMD and SE)
Total energy	6	HW vs. control	2	-0.02 (-0.121, 0.081)	-0.019 (-0.405, 0.367)	-0.02 (-0.118, 0.077)	0.994727	0.942327	0.83	0.975
		HW vs. NS	0	.	0.034 (-0.073, 0.14)	0.034 (-0.073, 0.14)	.	0
		HW vs. NW	1	0.09 (-0.116, 0.296)	0.067 (-0.069, 0.204)	0.074 (-0.039, 0.188)	0.85779	0.234808
		HW vs. TLS	0	.	0.039 (-0.067, 0.146)	0.039 (-0.067, 0.146)	.	0
		NS vs. control	3	-0.055 (-0.102, -0.009)	-0.017 (-0.26, 0.226)	-0.054 (-0.1, -0.008)	0.761193	0.982022
		NS vs. NW	1	0.06 (-0.025, 0.145)	-0.004 (-0.133, 0.126)	0.041 (-0.031, 0.112)	0.421098	0.703293
		NS vs. TLS	3	0.007 (-0.04, 0.054)	-0.054 (-0.358, 0.251)	0.006 (-0.04, 0.052)	0.699258	0.987973
		NW vs. control	2	-0.089 (-0.167, -0.01)	-0.115 (-0.258, 0.029)	-0.095 (-0.164, -0.025)	0.754716	0.748348
		NW vs. TLS	1	-0.02 (-0.105, 0.065)	-0.068 (-0.196, 0.059)	-0.035 (-0.106, 0.036)	0.536668	0.703072
		TLS vs. control	4	-0.06 (-0.105, -0.015)	-0.032 (-0.428, 0.365)	-0.06 (-0.104, -0.015)	0.88917	0.993982
Energy per 100g/ml	6	NS vs. control	3	-0.051 (-0.073, -0.029)	-0.032 (-0.106, 0.041)	-0.05 (-0.071, -0.028)	0.631758	0.901945	1.77	0.6207
		NS vs. NW	0	.	-0.007 (-0.036, 0.021)	-0.007 (-0.036, 0.021)	.	0
		NS vs. TLS	2	-0.007 (-0.032, 0.018)	-0.039 (-0.088, 0.011)	-0.013 (-0.036, 0.009)	0.264981	0.813186
		NW vs. control	2	-0.038 (-0.063, -0.013)	-0.055 (-0.101, -0.01)	-0.042 (-0.064, -0.02)	0.512402	0.896517
		NW vs. TLS	3	-0.009 (-0.033, 0.015)	0.009 (-0.044, 0.062)	-0.006 (-0.028, 0.016)	0.537036	0.670256
		TLS vs. control	4	-0.034 (-0.052, -0.016)	-0.06 (-0.121, 0.001)	-0.036 (-0.054, -0.019)	0.42643	0.909035
Change in sodium/salt content of purchased products (RMD and SE)
Total sodium/salt	4	NS vs. control	3	-0.032 (-0.092, 0.028)	0.131 (-0.293, 0.554)	-0.029 (-0.088, 0.031)	0.457045	0.988025	0.39	0.9419
		NS vs. NW	1	0.06 (-0.042, 0.162)	0.01 (-0.183, 0.203)	0.049 (-0.041, 0.139)	0.652531	0.769954
		NS vs. TLS	3	0.039 (-0.021, 0.099)	-0.131 (-0.555, 0.293)	0.036 (-0.024, 0.095)	0.436399	0.988025
		NW vs. control	1	-0.08 (-0.182, 0.022)	-0.07 (-0.259, 0.12)	-0.078 (-0.168, 0.012)	0.924271	0.766721
		NW vs. TLS	1	0 (-0.102, 0.102)	-0.059 (-0.249, 0.13)	-0.013 (-0.103, 0.077)	0.589778	0.766721
		TLS vs. control	4	-0.063 (-0.121, -0.005)	.	-0.064 (-0.122, -0.007)	.	1
Sodium/salt per 100g/ml	7	NS vs. control	4	-0.084 (-0.132, -0.035)	-0.008 (-0.182, 0.166)	-0.078 (-0.125, -0.031)	0.413857	0.952626	2.12	0.5481
		NS vs. NW	0	.	-0.057 (-0.128, 0.014)	-0.057 (-0.128, 0.014)	.	0
		NS vs. TLS	2	-0.033 (-0.093, 0.027)	-0.102 (-0.208, 0.005)	-0.05 (-0.102, 0.003)	0.2703	0.915126
		NW vs. control	2	0.012 (-0.061, 0.085)	-0.096 (-0.206, 0.014)	-0.021 (-0.082, 0.04)	0.110168	0.696631
		NW vs. TLS	3	-0.003 (-0.063, 0.057)	0.099 (-0.074, 0.272)	0.008 (-0.049, 0.065)	0.273356	0.833466
		TLS vs. control	4	-0.03 (-0.075, 0.016)	-0.019 (-0.167, 0.129)	-0.029 (-0.072, 0.015)	0.89394	0.968326
Change in sugar content of purchased products (RMD and SE)
Total sugar	6	HW vs. control	2	0.008 (-0.13, 0.146)	-0.268 (-0.66, 0.125)	-0.023 (-0.153, 0.108)	0.193986	0.888339	1.31	0.8589
		HW vs. NS	0	.	-0.003 (-0.156, 0.151)	-0.003 (-0.156, 0.151)	.	0
		HW vs. NW	2	-0.037 (-0.178, 0.103)	0.207 (-0.172, 0.586)	-0.008 (-0.139, 0.124)	0.235602	0.885537
		HW vs. TLS	0	.	-0.001 (-0.151, 0.149)	-0.001 (-0.151, 0.149)	.	0
		NS vs. control	3	-0.036 (-0.133, 0.061)	0.124 (-0.168, 0.417)	-0.02 (-0.112, 0.072)	0.308398	0.920073
		NS vs. NW	1	0.05 (-0.121, 0.221)	-0.062 (-0.236, 0.112)	-0.005 (-0.127, 0.117)	0.367023	0.454989
		NS vs. TLS	3	0 (-0.097, 0.097)	0.025 (-0.384, 0.434)	0.002 (-0.093, 0.096)	0.907172	0.966568
		NW vs. control	3	-0.006 (-0.114, 0.101)	-0.082 (-0.384, 0.22)	-0.015 (-0.116, 0.086)	0.644642	0.893381
		NW vs. TLS	1	-0.05 (-0.221, 0.121)	0.059 (-0.105, 0.223)	0.007 (-0.112, 0.125)	0.366151	0.450666
		TLS vs. control	4	-0.033 (-0.12, 0.054)	0.206 (-0.191, 0.603)	-0.022 (-0.107, 0.063)	0.250239	0.952309
Sugar per 100g/ml	8	NS vs. control	5	-0.016 (-0.088, 0.057)	-0.182 (-0.465, 0.102)	-0.026 (-0.096, 0.044)	0.266865	0.881993	3.81	0.2828
		NS vs. NW	0	.	0.01 (-0.099, 0.12)	0.01 (-0.099, 0.12)	.	0
		NS vs. TLS	2	-0.031 (-0.132, 0.07)	0.149 (-0.003, 0.301)	0.024 (-0.06, 0.108)	0.053158	0.633983
		NW vs. control	2	-0.063 (-0.178, 0.052)	0.021 (-0.146, 0.188)	-0.036 (-0.131, 0.058)	0.415093	0.87082
		NW vs. TLS	3	0.027 (-0.063, 0.116)	-0.115 (-0.398, 0.168)	0.014 (-0.072, 0.099)	0.350057	0.981014
		TLS vs. control	4	-0.067 (-0.141, 0.008)	0.103 (-0.122, 0.328)	-0.05 (-0.121, 0.021)	0.161204	0.975842
Change in fat content of purchased products (RMD and SE)
Total fat	3	NS vs. control	2	-0.173 (-0.304, -0.041)	-0.008 (-0.42, 0.404)	-0.157 (-0.283, -0.032)	0.45573	0.887749	5.46	0.0195
		NS vs. TLS	2	-0.063 (-0.198, 0.071)	-0.238 (-0.633, 0.157)	-0.082 (-0.209, 0.046)	0.411032	0.647665
		TLS vs. control	3	-0.077 (-0.182, 0.028)	.	-0.076 (-0.181, 0.029)	.	0.994886
Fat per 100g/ml	4	NS vs. control	3	-0.032 (-0.058, -0.006)	-0.045 (-0.229, 0.139)	-0.032 (-0.058, -0.007)	0.889581	0.988741	0	.
		NS vs. NW	0	.	0.027 (-0.04, 0.095)	0.027 (-0.04, 0.095)	.	0
		NS vs. TLS	3	-0.009 (-0.034, 0.016)	0.566 (0.178, 0.954)	-0.007 (-0.032, 0.019)	0.00373189	0.997852
		NW vs. control	0	.	-0.06 (-0.127, 0.008)	-0.06 (-0.127, 0.008)	.	0
		NW vs. TLS	1	-0.034 (-0.097, 0.029)	.	-0.034 (-0.097, 0.029)	.	1
		TLS vs. control	3	-0.024 (-0.05, 0.002)	-0.206 (-0.489, 0.076)	-0.026 (-0.051, 0)	0.20851	0.993782
Change in saturated fat content of purchased products
Total saturated fat	5	NS vs. control	3	-0.168 (-0.26, -0.076)	-0.208 (-0.544, 0.129)	-0.171 (-0.26, -0.082)	0.823159	0.973526	11.4	0.0225
		NS vs. NW	1	0.09 (-0.081, 0.261)	-0.119 (-0.301, 0.063)	-0.008 (-0.132, 0.117)	0.0998164	0.511673
		NS vs. TLS	2	-0.123 (-0.269, 0.023)	0.076 (-0.099, 0.251)	-0.041 (-0.153, 0.071)	0.08704	0.54867
		NW vs. control	2	-0.12 (-0.241, 0.001)	-0.419 (-0.715, -0.123)	-0.163 (-0.274, -0.051)	0.0663101	0.864504
		NW vs. TLS	1	-0.02 (-0.202, 0.162)	-0.046 (-0.227, 0.134)	-0.033 (-0.162, 0.095)	0.840932	0.456376
		TLS vs. control	4	-0.141 (-0.235, -0.047)	0.114 (-0.311, 0.538)	-0.129 (-0.221, -0.037)	0.251066	0.986135
Saturated fat per 100g/ml	11	NS vs. control	3	0.043 (-0.038, 0.124)	0.286 (0.139, 0.433)	0.1 (0.029, 0.171)	0.0045155	0.698835	4.16	0.3842
		NS vs. NW	0	.	0.156 (0.049, 0.264)	0.156 (0.049, 0.264)	.	0
		NS vs. TLS	1	0.31 (0.181, 0.439)	0.067 (-0.039, 0.174)	0.166 (0.083, 0.248)	0.0045155	0.33729
		NW vs. control	2	-0.051 (-0.149, 0.048)	-0.076 (-0.262, 0.109)	-0.057 (-0.143, 0.03)	0.812971	0.778563
		NW vs. TLS	2	0 (-0.102, 0.102)	0.036 (-0.138, 0.209)	0.009 (-0.079, 0.097)	0.727514	0.971172
		TLS vs. control	5	-0.024 (-0.096, 0.048)	-0.21 (-0.343, -0.077)	-0.066 (-0.129, -0.003)	0.0159853	0.956949
