# Supplementary material for: Impact of color-coded and warning nutrition labelling schemes: A systematic review and network meta-analysis
Source: PLoS Med. 2021 Oct 5;18(10):e1003765. doi: 10.1371/journal.pmed.1003765 (PMC8491916; doi:10.1371/journal.pmed.1003765)
Supplement: S9 Table — (XLSX) [file pmed.1003765.s017.xlsx]

## Sheet: S9_Table
S9 Table. The netsplitting of sensitivity network meta-analysis estimates (removing studies using NFt control) for changes in consumers dietary behaviours into the contribution of direct and indirect evidence and test for local inconsistency.
Outcome measures	Number of studies	Comparison	Number of comparisons	Direct estimate	Indirect estimate	Network estimate	P-value of inconsistency test	Proportion of direct evidence (%)	Full design-by-treatment model: Q statistic	Full design-by-treatment model: p-value associated with Q statistic
Probability of selecting less healthful/more healthful options (OR and 95%CI)
less healthful options	42	HW vs. control	14	0.64 (0.54, 0.77)	0.47 (0.19, 1.14)	0.63 (0.53, 0.76)	0.49456	0.961282	25	0.0008
		HW vs. NS	0	.	1.09 (0.82, 1.46)	1.09 (0.82, 1.46)	.	0
		HW vs. NW	2	1.08 (0.68, 1.7)	0.96 (0.72, 1.29)	0.99 (0.78, 1.27)	0.690812	0.286307
		HW vs. TLS	0	.	0.82 (0.65, 1.03)	0.82 (0.65, 1.03)	.	0
		NS vs. control	3	0.46 (0.32, 0.68)	0.67 (0.5, 0.92)	0.58 (0.46, 0.74)	0.132903	0.40168
		NS vs. NW	5	0.86 (0.63, 1.17)	1.01 (0.66, 1.53)	0.91 (0.71, 1.17)	0.555438	0.645802
		NS vs. TLS	5	0.99 (0.73, 1.36)	0.48 (0.33, 0.71)	0.75 (0.59, 0.95)	0.004012	0.602375
		NW vs. control	7	0.6 (0.46, 0.77)	0.69 (0.52, 0.92)	0.64 (0.53, 0.77)	0.450618	0.553447
		NW vs. TLS	7	1 (0.77, 1.3)	0.62 (0.45, 0.84)	0.82 (0.67, 1)	0.01965	0.591991
		TLS vs. control	15	0.87 (0.73, 1.04)	0.52 (0.38, 0.73)	0.78 (0.67, 0.91)	0.007067	0.771683
more healthful options	47	HW vs. control	14	1.61 (1.29, 2.02)	5.28 (1.12, 24.87)	1.65 (1.32, 2.07)	0.137381	0.979283	54.25	< 0.0001
		HW vs. NS	0	.	0.69 (0.48, 0.98)	0.69 (0.48, 0.98)	.	0
		HW vs. NW	1	0.82 (0.34, 1.95)	0.56 (0.41, 0.77)	0.58 (0.43, 0.79)	0.414761	0.119584
		HW vs. TLS	0	.	0.84 (0.63, 1.13)	0.84 (0.63, 1.13)	.	0
		NS vs. control	3	1.52 (0.96, 2.39)	3.21 (2.24, 4.6)	2.4 (1.81, 3.19)	0.011368	0.384548
		NS vs. NW	5	1.5 (1.04, 2.16)	0.32 (0.2, 0.52)	0.85 (0.63, 1.14)	6.14e-07	0.632719
		NS vs. TLS	5	1.1 (0.76, 1.58)	1.46 (0.91, 2.34)	1.22 (0.92, 1.63)	0.345303	0.62675
		NW vs. control	12	4.3 (3.31, 5.59)	1.29 (0.9, 1.84)	2.83 (2.29, 3.49)	9.47e-08	0.652117
		NW vs. TLS	7	0.83 (0.61, 1.13)	2.97 (2.08, 4.25)	1.44 (1.14, 1.82)	1.35e-07	0.56814
		TLS vs. control	14	1.54 (1.23, 1.94)	3.79 (2.6, 5.52)	1.97 (1.62, 2.39)	6.52e-05	0.729847
Purchase intention for less healthful/more healthful products (RMD and SE)
Purchase intention for less healthful products	15	HW vs. control	5	-0.072 (-0.214, 0.071)	-0.441 (-1.092, 0.211)	-0.089 (-0.228, 0.051)	0.278328	0.996619	0.15	0.8129
		HW vs. NS	0	.	-0.083 (-0.501, 0.336)	-0.083 (-0.501, 0.336)	.	0
		HW vs. NW	1	0.01 (-0.319, 0.339)	0.253 (0.043, 0.462)	0.183 (0.006, 0.359)	0.223027	0.0445242
		HW vs. TLS	0	.	0.006 (-0.181, 0.194)	0.006 (-0.181, 0.194)	.	0
		NS vs. control	1	-0.006 (-0.401, 0.389)	.	-0.006 (-0.401, 0.389)	.	1
		NS vs. NW	0	.	0.265 (-0.149, 0.679)	0.265 (-0.149, 0.679)	.	0
		NS vs. TLS	0	.	0.089 (-0.326, 0.505)	0.089 (-0.326, 0.505)	.	0
		NW vs. control	6	-0.289 (-0.419, -0.159)	-0.101 (-0.507, 0.305)	-0.271 (-0.395, -0.147)	0.388553	0.998818
		NW vs. TLS	2	-0.165 (-0.387, 0.058)	-0.189 (-0.417, 0.04)	-0.176 (-0.336, -0.017)	0.883899	0.982515
		TLS vs. control	6	-0.097 (-0.231, 0.036)	-0.067 (-0.564, 0.43)	-0.095 (-0.224, 0.034)	0.909464	0.983899
Purchase intention for more healthful products	6	HW vs. control	3	0.249 (0.01, 0.488)	.	0.249 (0.01, 0.488)	.	1	0.42	0.5186
		HW vs. NS	0	.	0.124 (-0.377, 0.625)	0.124 (-0.377, 0.625)	.	0
		HW vs. NW	0	.	0.429 (0.058, 0.8)	0.429 (0.058, 0.8)	.	0
		HW vs. TLS	0	.	0.246 (-0.201, 0.693)	0.246 (-0.201, 0.693)	.	0
		NS vs. control	1	0.125 (-0.315, 0.565)	.	0.125 (-0.315, 0.565)	.	1
		NS vs. NW	0	.	0.305 (-0.218, 0.829)	0.305 (-0.218, 0.829)	.	0
		NS vs. TLS	0	.	0.122 (-0.457, 0.702)	0.122 (-0.457, 0.702)	.	0
		NW vs. control	2	-0.182 (-0.465, 0.102)	.	-0.18 (-0.464, 0.103)	.	1
		NW vs. TLS	1	-0.12 (-0.522, 0.282)	-0.628 (-1.695, 0.44)	-0.183 (-0.56, 0.193)	0.38327	0.911102
		TLS vs. control	1	0.067 (-0.337, 0.471)	-0.436 (-1.492, 0.62)	0.003 (-0.375, 0.38)	0.38327	0.65009
Change in overall healthfulness of purchased products (RMD and SE)
overall healthfulness	11	NS vs. control	5	0.064 (0.011, 0.117)	0.177 (-0.002, 0.356)	0.073 (0.022, 0.124)	0.234262	0.949996	55.77	< 0.0001
		NS vs. NW	0	.	-0.317 (-0.417, -0.217)	-0.317 (-0.417, -0.217)	.	0
		NS vs. TLS	2	0.015 (-0.049, 0.079)	-0.019 (-0.135, 0.096)	0.007 (-0.049, 0.063)	0.610031	0.932398
		NW vs. control	1	0.542 (0.436, 0.648)	0.037 (-0.125, 0.199)	0.39 (0.301, 0.479)	3.1818e-07	0.825251
		NW vs. TLS	1	0 (-0.155, 0.155)	0.505 (0.389, 0.622)	0.324 (0.231, 0.417)	3.1818e-07	0.179649
		TLS vs. control	6	0.033 (-0.016, 0.081)	0.367 (0.224, 0.511)	0.066 (0.021, 0.112)	1.47292e-05	0.990942
Change in energy content of purchased products (RMD and SE)
Total energy	6	HW vs. control	2	-0.02 (-0.121, 0.081)	-0.019 (-0.405, 0.367)	-0.02 (-0.118, 0.077)	0.994727	0.942327	0.83	0.975
		HW vs. NS	0	.	0.034 (-0.073, 0.14)	0.034 (-0.073, 0.14)	.	0
		HW vs. NW	1	0.09 (-0.116, 0.296)	0.067 (-0.069, 0.204)	0.074 (-0.039, 0.188)	0.85779	0.234808
		HW vs. TLS	0	.	0.039 (-0.067, 0.146)	0.039 (-0.067, 0.146)	.	0
		NS vs. control	3	-0.055 (-0.102, -0.009)	-0.017 (-0.26, 0.226)	-0.054 (-0.1, -0.008)	0.761193	0.982022
		NS vs. NW	1	0.06 (-0.025, 0.145)	-0.004 (-0.133, 0.126)	0.041 (-0.031, 0.112)	0.421098	0.703293
		NS vs. TLS	3	0.007 (-0.04, 0.054)	-0.054 (-0.358, 0.251)	0.006 (-0.04, 0.052)	0.699258	0.987973
		NW vs. control	2	-0.089 (-0.167, -0.01)	-0.115 (-0.258, 0.029)	-0.095 (-0.164, -0.025)	0.754716	0.748348
		NW vs. TLS	1	-0.02 (-0.105, 0.065)	-0.068 (-0.196, 0.059)	-0.035 (-0.106, 0.036)	0.536668	0.703072
		TLS vs. control	4	-0.06 (-0.105, -0.015)	-0.032 (-0.428, 0.365)	-0.06 (-0.104, -0.015)	0.88917	0.993982
Energy per 100g/ml	5	NS vs. control	3	-0.055 (-0.084, -0.026)	-0.007 (-0.187, 0.173)	-0.054 (-0.083, -0.025)	0.603013	0.983245	3.67	0.7042
		NS vs. NW	0	.	-0.009 (-0.065, 0.046)	-0.009 (-0.065, 0.046)	.	0
		NS vs. TLS	2	-0.006 (-0.041, 0.028)	-0.059 (-0.15, 0.031)	-0.013 (-0.045, 0.019)	0.283501	0.928844
		NW vs. control	1	-0.01 (-0.116, 0.096)	-0.056 (-0.118, 0.005)	-0.045 (-0.098, 0.009)	0.456937	0.135229
		NW vs. TLS	2	-0.007 (-0.054, 0.041)	0.083 (-0.167, 0.332)	-0.004 (-0.05, 0.043)	0.489701	0.97964
		TLS vs. control	3	-0.038 (-0.069, -0.007)	-0.08 (-0.189, 0.03)	-0.041 (-0.071, -0.011)	0.469419	0.957495
Change in sodium/salt content of purchased products (RMD and SE)
Total sodium/salt	4	NS vs. control	3	-0.032 (-0.092, 0.028)	0.131 (-0.293, 0.554)	-0.029 (-0.088, 0.031)	0.457045	0.988025	0.39	0.9419
		NS vs. NW	1	0.06 (-0.042, 0.162)	0.01 (-0.183, 0.203)	0.049 (-0.041, 0.139)	0.652531	0.769954
		NS vs. TLS	3	0.039 (-0.021, 0.099)	-0.131 (-0.555, 0.293)	0.036 (-0.024, 0.095)	0.436399	0.988025
		NW vs. control	1	-0.08 (-0.182, 0.022)	-0.07 (-0.259, 0.12)	-0.078 (-0.168, 0.012)	0.924271	0.766721
		NW vs. TLS	1	0 (-0.102, 0.102)	-0.059 (-0.249, 0.13)	-0.013 (-0.103, 0.077)	0.589778	0.766721
		TLS vs. control	4	-0.063 (-0.121, -0.005)	.	-0.064 (-0.122, -0.007)	.	1
Sodium/salt per 100g/ml	6	NS vs. control	4	-0.084 (-0.133, -0.035)	-0.225 (-0.524, 0.073)	-0.087 (-0.136, -0.039)	0.358414	0.994426	1.91	0.5913
		NS vs. NW	0	.	-0.005 (-0.105, 0.096)	-0.005 (-0.105, 0.096)	.	0
		NS vs. TLS	2	-0.033 (-0.093, 0.027)	-0.035 (-0.181, 0.112)	-0.033 (-0.089, 0.022)	0.984419	0.966794
		NW vs. control	1	-0.07 (-0.242, 0.102)	-0.089 (-0.206, 0.029)	-0.083 (-0.18, 0.014)	0.86083	0.191577
		NW vs. TLS	2	-0.02 (-0.11, 0.071)	-0.154 (-0.496, 0.189)	-0.029 (-0.116, 0.059)	0.457824	0.947166
		TLS vs. control	3	-0.053 (-0.109, 0.003)	-0.063 (-0.228, 0.101)	-0.054 (-0.107, -0.001)	0.907353	0.969241
Change in sugar content of purchased products (RMD and SE)
Total sugar	6	HW vs. control	2	0.008 (-0.13, 0.146)	-0.268 (-0.66, 0.125)	-0.023 (-0.153, 0.108)	0.193986	0.888339	1.31	0.8589
		HW vs. NS	0	.	-0.003 (-0.156, 0.151)	-0.003 (-0.156, 0.151)	.	0
		HW vs. NW	2	-0.037 (-0.178, 0.103)	0.207 (-0.172, 0.586)	-0.008 (-0.139, 0.124)	0.235602	0.885537
		HW vs. TLS	0	.	-0.001 (-0.151, 0.149)	-0.001 (-0.151, 0.149)	.	0
		NS vs. control	3	-0.036 (-0.133, 0.061)	0.124 (-0.168, 0.417)	-0.02 (-0.112, 0.072)	0.308398	0.920073
		NS vs. NW	1	0.05 (-0.121, 0.221)	-0.062 (-0.236, 0.112)	-0.005 (-0.127, 0.117)	0.367023	0.454989
		NS vs. TLS	3	0 (-0.097, 0.097)	0.025 (-0.384, 0.434)	0.002 (-0.093, 0.096)	0.907172	0.966568
		NW vs. control	3	-0.006 (-0.114, 0.101)	-0.082 (-0.384, 0.22)	-0.015 (-0.116, 0.086)	0.644642	0.893381
		NW vs. TLS	1	-0.05 (-0.221, 0.121)	0.059 (-0.105, 0.223)	0.007 (-0.112, 0.125)	0.366151	0.450666
		TLS vs. control	4	-0.033 (-0.12, 0.054)	0.206 (-0.191, 0.603)	-0.022 (-0.107, 0.063)	0.250239	0.952309
Sugar per 100g/ml	6	NS vs. control	4	0.002 (-0.089, 0.093)	-0.174 (-0.677, 0.329)	-0.004 (-0.093, 0.086)	0.500485	0.989756	5.63	0.1311
		NS vs. NW	0	.	-0.021 (-0.192, 0.15)	-0.021 (-0.192, 0.15)	.	0
		NS vs. TLS	2	-0.032 (-0.157, 0.092)	0.227 (-0.019, 0.473)	0.02 (-0.091, 0.131)	0.0651766	0.914286
		NW vs. control	1	-0.01 (-0.266, 0.246)	0.036 (-0.174, 0.246)	0.017 (-0.145, 0.18)	0.786033	0.11497
		NW vs. TLS	2	0.053 (-0.093, 0.198)	-0.118 (-0.664, 0.429)	0.041 (-0.099, 0.182)	0.55459	0.977906
		TLS vs. control	3	-0.058 (-0.168, 0.052)	0.238 (-0.067, 0.543)	-0.024 (-0.127, 0.079)	0.0730888	0.924571
Change in fat content of purchased products (RMD and SE)
Total fat	3	NS vs. control	2	-0.173 (-0.304, -0.041)	-0.008 (-0.42, 0.404)	-0.157 (-0.283, -0.032)	0.45573	0.887749	5.46	0.0195
		NS vs. TLS	2	-0.063 (-0.198, 0.071)	-0.238 (-0.633, 0.157)	-0.082 (-0.209, 0.046)	0.411032	0.647665
		TLS vs. control	3	-0.077 (-0.182, 0.028)	.	-0.076 (-0.181, 0.029)	.	0.994886
Fat per 100g/ml	4	NS vs. control	3	-0.032 (-0.058, -0.006)	-0.045 (-0.229, 0.139)	-0.032 (-0.058, -0.007)	0.889581	0.988741	0	.
		NS vs. NW	0	.	0.027 (-0.04, 0.095)	0.027 (-0.04, 0.095)	.	0
		NS vs. TLS	3	-0.009 (-0.034, 0.016)	0.566 (0.178, 0.954)	-0.007 (-0.032, 0.019)	0.00373189	0.997852
		NW vs. control	0	.	-0.06 (-0.127, 0.008)	-0.06 (-0.127, 0.008)	.	0
		NW vs. TLS	1	-0.034 (-0.097, 0.029)	.	-0.034 (-0.097, 0.029)	.	1
		TLS vs. control	3	-0.024 (-0.05, 0.002)	-0.206 (-0.489, 0.076)	-0.026 (-0.051, 0)	0.20851	0.993782
Change in saturated fat content of purchased products (RMD and SE)
Total saturated fat	5	NS vs. control	3	-0.168 (-0.26, -0.076)	-0.208 (-0.544, 0.129)	-0.171 (-0.26, -0.082)	0.823159	0.973526	11.4	0.0225
		NS vs. NW	1	0.09 (-0.081, 0.261)	-0.119 (-0.301, 0.063)	-0.008 (-0.132, 0.117)	0.0998164	0.511673
		NS vs. TLS	2	-0.123 (-0.269, 0.023)	0.076 (-0.099, 0.251)	-0.041 (-0.153, 0.071)	0.08704	0.54867
		NW vs. control	2	-0.12 (-0.241, 0.001)	-0.419 (-0.715, -0.123)	-0.163 (-0.274, -0.051)	0.0663101	0.864504
		NW vs. TLS	1	-0.02 (-0.202, 0.162)	-0.046 (-0.227, 0.134)	-0.033 (-0.162, 0.095)	0.840932	0.456376
		TLS vs. control	4	-0.141 (-0.235, -0.047)	0.114 (-0.311, 0.538)	-0.129 (-0.221, -0.037)	0.251066	0.986135
Saturated fat per 100g/ml	11	NS vs. control	3	0.043 (-0.038, 0.124)	0.286 (0.139, 0.433)	0.1 (0.029, 0.171)	0.0045155	0.698835	4.16	0.3842
		NS vs. NW	0	.	0.156 (0.049, 0.264)	0.156 (0.049, 0.264)	.	0
		NS vs. TLS	1	0.31 (0.181, 0.439)	0.067 (-0.039, 0.174)	0.166 (0.083, 0.248)	0.0045155	0.33729
		NW vs. control	2	-0.051 (-0.149, 0.048)	-0.076 (-0.262, 0.109)	-0.057 (-0.143, 0.03)	0.812971	0.778563
		NW vs. TLS	2	0 (-0.102, 0.102)	0.036 (-0.138, 0.209)	0.009 (-0.079, 0.097)	0.727514	0.971172
		TLS vs. control	5	-0.024 (-0.096, 0.048)	-0.21 (-0.343, -0.077)	-0.066 (-0.129, -0.003)	0.0159853	0.956949
